# Supplementary material for: Exploring the developmental tasks of emerging adults after paediatric heart transplantation: a cross-sectional case control study
Source: PubMed Central journal article supplement — BMJ Open. 2018 Nov 25;8(11):e022461. doi: 10.1136/bmjopen-2018-022461 (PMC6254420; doi:10.1136/bmjopen-2018-022461), 2018-11-25
Supplement: bmjopen-2018-022461.draft_revisions.pdf [file bmjopen-2018-022461.draft_revisions.pdf]

# BMJ Open

BMJ Open is committed to open peer review. As part of this commitment we make the peer review history of every article we publish publicly available.

When an article is published we post the peer reviewers' comments and the authors' responses online. We also post the versions of the paper that were used during peer review. These are the versions that the peer review comments apply to.

The versions of the paper that follow are the versions that were submitted during the peer review process. They are not the versions of record or the final published versions. They should not be cited or distributed as the published version of this manuscript.

BMJ Open is an open access journal and the full, final, typeset and author-corrected version of record of the manuscript is available on our site with no access controls, subscription charges or pay-per-view fees (<http://bmjopen.bmj.com>).

If you have any questions on BMJ Open's open peer review process please email [editorial.bmjopen@bmj.com](mailto:editorial.bmjopen@bmj.com)

# BMJ Open

## Exploring the developmental tasks of emerging adults after pediatric heart transplantation- a cross-sectional case control study

|                               |                                                                                                                                                                                                                                                                                                                                                                                                                                                                                                           |
|-------------------------------|-----------------------------------------------------------------------------------------------------------------------------------------------------------------------------------------------------------------------------------------------------------------------------------------------------------------------------------------------------------------------------------------------------------------------------------------------------------------------------------------------------------|
| Journal:                      | <i>BMJ Open</i>                                                                                                                                                                                                                                                                                                                                                                                                                                                                                           |
| Manuscript ID                 | bmjopen-2018-022461                                                                                                                                                                                                                                                                                                                                                                                                                                                                                       |
| Article Type:                 | Research                                                                                                                                                                                                                                                                                                                                                                                                                                                                                                  |
| Date Submitted by the Author: | 22-Feb-2018                                                                                                                                                                                                                                                                                                                                                                                                                                                                                               |
| Complete List of Authors:     | Sepke, Maria; Deutsches Herzzentrum Berlin, Psychosomatic; Steinbeis-Hochschule Berlin, Steinbeis Transfer Institute Medical Psychology<br>Ferentzi, Hannah; Deutsches Herzzentrum Berlin, Department of Congenital Heart Disease - Paediatric Cardiology<br>Disselhoff, Vera; Steinbeis-Hochschule Berlin, Steinbeis Transfer Institute Medical Psychology<br>Albert, Wolfgang; Deutsches Herzzentrum Berlin, Psychosomatic; Steinbeis-Hochschule Berlin, Steinbeis-Transfer-Institut Medical Psychology |
| Keywords:                     | heart transplantation, developmental tasks, Paediatric cardiology < CARDIOLOGY, Quality of Life, psychosocial                                                                                                                                                                                                                                                                                                                                                                                             |
|                               |                                                                                                                                                                                                                                                                                                                                                                                                                                                                                                           |

SCHOLARONE™  
Manuscripts

1  
2  
3  
4  
5 **Exploring the developmental tasks of emerging adults after pediatric**  
6 **heart transplantation- a cross-sectional case control study**  
7  
8  
9

10 Maria Sepke<sup>1,2</sup>, Hannah Ferentzi<sup>1,3</sup>, Vera Stéphanie Umutoni Disselhoff<sup>2</sup>, Wolfgang Albert<sup>1,2,4</sup>

11  
12 1 Unit for Psychosomatic Medicine, Department of Cardiothoracic and Vascular Surgery, German  
13 Heart Center Berlin, Augustenburger Platz 1, 13353 Berlin, Germany

14  
15 2 Steinbeis Transfer Institute Medical Psychology, Steinbeis Hochschule Berlin, Augustenburger Platz  
16 1, 13353 Berlin, Germany

17  
18 3 Department of Congenital Heart Disease- Pediatric Cardiology, German Heart Center, Berlin,  
19 Germany

20  
21 4 DZHK (German Center for Cardiovascular Research), Partner Site Berlin, Oudenarder Str. 16, 13347  
22 Berlin, Germany  
23  
24  
25

26  
27  
28  
29 Corresponding Author:

30  
31 Maria Sepke  
32 Augustenburger Platz 1  
33 13353 Berlin, Germany  
34

35 sepke@dhzb.de  
36 phone: +49 30 4593 7158  
37 fax: +49 30 4593 2191  
38  
39

40  
41 Keywords: heart transplantation, developmental tasks, emerging adults, pediatric, psychosocial  
42  
43  
44

45 Word count: 3.992 (excluding the title page, abstract, references, tables, boxes, or figures) [4.736  
46 including tables]  
47  
48  
49  
50  
51  
52  
53  
54  
55  
56  
57  
58  
59  
60

## Abstract

### Objective

Pediatric heart transplantation (PHTX) comprises 12% of all cardiac transplants and many of the children now survive into adulthood. Only few studies have investigated the long-term psychosocial well-being of young adult patients after PHTX; no studies have investigated developmental tasks of emerging adulthood in different domains (family, social environment, education and profession, partnership, social environment).

### Setting

Specialized heart center in Germany.

### Participants

Thirty-eight young adults aged 22.11 years (SD=4.7) who underwent PHTX and a control group of 46 participants with no known chronic diseases, aged 22.91 years (SD=1.8), participated in the study.

### Outcome measures

All participants completed the following questionnaires: sociodemographic, the F-SozU, to measure perceived social support, the GBB to measure subjective complaints experienced by patients, the KIDSCREEN-27 to measure well-being, and the SF-36 to measure health-related quality of life (QoL).

### Results

'Family': the quality of the relationship with the parents was found to be equal in both groups, while PHTX patients stayed in closer spatial proximity to their parents. 'Social environment': PHTX patients reported lower social support by peers than the control group. 'Education and profession': PHTX patients most often worked full-time (23%), had no job and/or received a pension (21%). In comparison, most of the healthy controls did an apprenticeship (40%) and/or worked part time (32%). 'Partnership': fewer of the PHTX patients had a partner than the control group while relationship duration did not differ. In exploratory regression analyses, social support by peers predicted physical QoL, whereas physical complaints and the physical role predicted mental QoL in PHTX patients.

### Conclusions

Our exploratory findings highlight important similarities and differences in specific developmental tasks between PHTX patients and healthy controls. Future studies should focus on developmental tasks of PHTX patients in this age group more systematically, investigating their role for physical and mental well-being in a confirmatory manner.

**Strength and Limitations**

- To our knowledge, this study is one of the first to investigate the developmental tasks in the specific group of emerging adults after PHTX, which has theoretical implications and which is relevant to the psychosocial care of these patients.

- This is a hypothesis-generating study with the unique approach of using well-established questionnaires for the exploration of developmental domains.

- This study is cross-sectional, so no inferences can be made with regard to development across time.

A convenience sample control group was used, which limits generalizability of the results.

- As this was an exploratory study, results should be replicated in confirmatory manner, based on carefully developed hypotheses.

## Introduction

Pediatric heart transplantation (PHTX) is an established therapy for end-stage cardiac disease(1) and has increased worldwide to more than 12,000 reported transplants in children since the first procedure in 1967(2). In 2014, a total of 586 heart transplants in children (aged < 18 years) were performed worldwide(3). They comprise 12% of all cardiac transplants reported to the Registry of the International Society for Heart and Lung Transplantation(4). Median survival of children after heart transplantation has increased to about 20 years(5, 6), with the lowest 3-year survival rate in children in Europe under the age of 1 (84.0) and the highest in children between the ages 6 to 10 (89.1)(7, 8). Accordingly, an increasing amount of research focuses on long-term outcomes and quality of life (QoL) after PHTX. Although it is life-saving, it is not curative and children are confronted with chronic health problems(9). Research generally suggests that chronic and/or serious disease in childhood is associated with an increased risk for non-normative physical, psychological and social development(10-12). Serious disease is negatively associated with QoL and identity development of children and adolescents and puts young adults at risk for reduced occupational and social success(13-16). When it comes to PHTX, research shows that it is associated with large improvements in functional status(17). At the same time, a substantial proportion of children and adolescents after PHTX report psychological problems, such as depression, anxiety and behavioral problems(18-22). These psychological problems potentially negatively impact QoL, alongside socio-demographic and medical factors such as renal diseases(23) and infections(24). Later in life, the majority of patients achieve important academic and professional milestones and social well-being(25). A study on adult patients after PHTX reports good QoL and good academic and professional achievement, while patients were most satisfied in the family domain and least satisfied in the psychological and spiritual domain. Most respondents had graduated from high school, reported an average annual income and lived independently(26). Another study focused on the population of young adults (aged 18-25), comparing PHTX patients with two other patient groups (patients with congenital heart disease of moderate severity and patients with congenital heart disease of complex severity). Results showed no differences between the groups in terms of psychosocial maturity, parental fostering of autonomy and transition readiness. Higher psychosocial maturity and parental fostering of autonomy were associated with better perceived mental health and QoL(27). While this study has contributed important insights into psychosocial development of young adults after PHTX, more research into the unique developmental tasks of PHTX patients during emerging adulthood is needed in order to discern a multitude of factors that are potentially relevant to their subjective well-being and QoL.

Emerging adulthood describes a developmental phase of individuals in industrialized countries lasting from the late teens to late twenties, with specific developmental tasks: a) detachment from the

1  
2  
3 family with spatial (home stay), financial (support from parents) and emotional independence  
4 (autonomy experience); b) apprenticeship, training and entering career with the topics of leaving  
5 school and finding a job (professional identity); and c), entering romantic relationships (partner  
6 selection, building an intimate relationship with a partner)(28-31). In addition, the social  
7 environment, especially the peer group, is crucial for well-being and closely linked to the self-  
8 reported QoL in this age group(32). In the present study, these developmental tasks in young adults  
9 after PHTX were investigated by using well-established questionnaires and by re-grouping subscales  
10 and items into developmental domains for exploratory analysis (for an overview, see table 1): a)  
11 family (financial and spatial independence, relationship with the parents; b) education and  
12 profession (educational level, number of school years, number of missed school years, employment  
13 situation, financial situation); c) partnership (marital status, partner status and duration of longest  
14 relationship); and d) social environment (social support in general, by peers, feelings about school  
15 and social functioning, as well as re-integration at school after PHTX). Furthermore, we looked at  
16 subjective physical well-being (specifically, the concept subjective physical complaints comprising the  
17 subscales fatigue tendency, gastric complaints, limb pain and heart complaints, as well as the  
18 concept physical well-being) and at psychological well-being. Finally, we assessed physical QoL (by  
19 means of the SF-36 subscales physical functioning, general health, vitality, physical role, pain and the  
20 physical summary scale) and psychological QoL (by means of the SF-36 subscales vitality, social  
21 functioning, emotional role, mental health and the mental summary scale), in order to gain an  
22 impression of the current subjective health status of the sample.  
23  
24  
25  
26  
27  
28  
29  
30  
31  
32  
33  
34  
35

36 Table 1. Overview of the instruments we used, clarifying domains and concepts

| DOMAIN                          | CONCEPT                       | INSTRUMENT                | (SUB)SCALE/ ITEM                    |
|---------------------------------|-------------------------------|---------------------------|-------------------------------------|
| <b>FAMILY</b>                   |                               |                           |                                     |
|                                 | Current living situation      | Demographic questionnaire | Living Situation (Item)             |
|                                 | Spatial independence          | Demographic questionnaire | Distance from Parents (Item)        |
|                                 | Relationship with the parents | Kidscreen-27              | Autonomy & Parent Relation Subscale |
| <b>EDUCATION AND PROFESSION</b> |                               |                           |                                     |
|                                 | Educational level             | Demographic questionnaire | Highest Completed Education (Item)  |
|                                 | Repeated school years         | Demographic               | Number of Repeated School           |

|                                            |                                  |                           |                                           |
|--------------------------------------------|----------------------------------|---------------------------|-------------------------------------------|
|                                            |                                  | questionnaire             | Years (Item)                              |
|                                            | Employment situation             | Demographic questionnaire | Current Employment Situation (Item)       |
|                                            | Financial situation              | Demographic questionnaire | Maintaining Livelihood (Item)             |
|                                            |                                  |                           |                                           |
| <b>PARTNERSHIP</b>                         |                                  |                           |                                           |
|                                            | Marital status                   | Demographic questionnaire | Marital Status (Item)                     |
|                                            | Partner status                   | Demographic questionnaire | Partner Status (Item)                     |
|                                            | Duration of longest relationship | Demographic questionnaire | Duration of Longest Relationship (Item)   |
| <b>SOCIAL ENVIRONMENT</b>                  |                                  |                           |                                           |
|                                            | Social support in general        | F-SozU                    | F-SozU Total Score                        |
|                                            | Social support by peers          | Kidscreen-27              | Subscale Perceived Social Support & Peers |
|                                            | Feelings about school            | Kidscreen-27              | Subscale School                           |
|                                            | Social functioning               | SF-36                     | Subscale Self-Rated Social Function       |
|                                            | Re-integration after PHTX        | Demographic questionnaire | Re-Integration at School (Item)           |
| <b>SUBJECTIVE PHYSICAL WELL-BEING</b>      |                                  |                           |                                           |
|                                            | Subjective physical complaints   | GBB                       | Total Score                               |
|                                            | Fatigue Tendency                 | GBB                       | Subscale Fatigue Tendency                 |
|                                            | Gastric Complaints               | GBB                       | Subscale Gastric Complaints               |
|                                            | Limb Pain                        | GBB                       | Subscale Limb Pain                        |
|                                            | Heart Complaints                 | GBB                       | Subscale Heart Complaints                 |
|                                            | Physical well-being              | Kidscreen-27              | Subscale Physical Well-Being              |
| <b>SUBJECTIVE PSYCHOLOGICAL WELL-BEING</b> |                                  |                           |                                           |



|            |                                          |              |                                   |
|------------|------------------------------------------|--------------|-----------------------------------|
|            | Psychological well-being                 | Kidscreen-27 | Subscale Psychological Well-Being |
| <b>QOL</b> |                                          |              |                                   |
|            | Physical functioning                     | SF-36        | Subscale Physical Functioning     |
|            | General health                           | SF-36        | Subscale General Health           |
|            | Physical limits in everyday functioning  | SF-36        | Subscale Physical Role            |
|            | Pain                                     | SF-36        | Subscale Bodily Pain              |
|            | <b>Physical quality of life</b>          | SF-36        | Physical Summary Scale            |
|            | Vitality                                 | SF-36        | Subscale Vitality                 |
|            | Social functioning                       | SF-36        | Subscale Social Functioning       |
|            | Emotional limits in everyday functioning | SF-36        | Subscale Emotional Role           |
|            | Mental health                            | SF-36        | Subscale Mental Health            |
|            | <b>Psychological quality of life</b>     | SF-36        | Mental Summary Scale              |

## Methods

### Participant and Public Involvement

A total of 169 children and adolescents underwent a PHTX at the clinic from 1986 to 2010, of which 101 survived. In this cross-sectional study, young adults between the ages of 16 and 35 years who underwent heart transplantation when they were children (< 18 years) at a specialized heart center were eligible for participation. Patients were recruited during the routine medical checks in the hospital. Participation was voluntary. The study was approved by the Medical Ethics Committee Charité Mitte (Nr.EA2/002/10). Fifty-two eligible patients met the inclusion criteria, of whom 38 agreed to participate in the study.

Participants were approached via telephone/mail and informed about the study. If interested in participation, they received an information letter from the research team about the objectives, design and procedure of the study. Informed consent was obtained from all participants via mail. After that, participants received questionnaires on paper, a stamped envelope and a letter with instructions on how to fill out and return the questionnaires via mail. Patients were instructed to fill out the questionnaires at home and to return the completed questionnaires using the stamped envelope.

1  
2  
3 A comparison group of 46 young healthy controls between the ages of 19 and 26 years with no  
4 known chronic diseases was recruited via social networks and personal contacts. Eligible participants  
5 were contacted by phone, e-mail or personally. Informed consent of each participant was obtained;  
6 participants then received the questionnaires via e-mail, mail (together with a stamped envelope), or  
7 in person. Questionnaires were returned via mail or in person.  
8  
9

10 Outcome had been determined for all patients who previously asked for results by the end of the  
11 data collection (December 2016). Due to the exploratory design, the development of the research  
12 question was not informed by patients' priorities, experience, and preferences.  
13  
14  
15

16  
17 Inclusion Criteria PHTX patients:

- 18 - PHTX at the clinic from 1986 to 2010
- 19 - Current age between 16 and 35 years

20  
21 Inclusion Criteria healthy controls:

- 22 - Young adults between the ages of 16 and 35 years
- 23 - No known chronic disease

## 24 25 26 27 **Instruments**

### 28 29 *Demographics*

30 Demographic information was obtained via a questionnaire developed by the research team with the  
31 following items: marital status, partner status, duration of longest relationship, living situation,  
32 distance from parents' home, educational level, number of repeated school years, current  
33 employment situation, maintaining livelihood, successful re-integration at school after PHTX. For an  
34 overview of items used for the analysis of each developmental domain, see table 1. Additionally, the  
35 variables age, sex and date of transplantation were obtained from medical records.  
36  
37  
38  
39  
40

### 41 42 *Social Support Questionnaire- Short Form*

43 The German version of the Social Support Questionnaire-Short Form (Fragebogen zur Sozialen  
44 Unterstützung; F-SozU, K-14) was used, which is a 14-item self-report of subjectively perceived or  
45 anticipated social support. A total score can be computed, which ranges from 1 to 5 and which was  
46 used for the analysis of the domain 'social environment'; see table 1. Psychometric properties are  
47 good (33).  
48  
49  
50

### 51 52 *Giessen Complaints Inventory*

53 The German version of the Giessen Complaints Inventory (Gießener Beschwerde-Bogen, GBB) by  
54 Brähler and Scheer (1995) was used. The GBB is an instrument for physical complaints frequently  
55 used in Germany which measures subjective limitations experienced by patients due to their physical  
56  
57  
58  
59

1  
2  
3 symptoms. The questionnaire comprises 24 items and contains the following subscales: fatigue  
4 tendency, gastric complaints, limb pain and heart complaints. Scores per subscale range from 0 to 24.  
5 A total score (general discomfort) can be computed, which ranges from 0 to 96 points. The total  
6 score was used for the analysis of the domain 'subjective physical well-being'. Psychometric  
7 properties are good.  
8  
9

### 10 11 12 *Kidscreen-27*

13 The KIDSCREEN-27 by Ravens-Sieberer et al. (2005) is a German questionnaire for health-related QoL  
14 specifically developed for children. It measures the following five subscales: 'autonomy and parent  
15 relations', which we used in the domain 'family', 'perceived social support & peers' and 'school', both  
16 of which we used in the domain 'social environment'; 'physical well-being' and 'psychological well-  
17 being', which we used in the domains 'subjective physical well-being' and 'subjective psychological  
18 well-being' (see table 1). Scores per subscale range from 0 to 100, with a higher score indicating a  
19 better QoL. A total score can be computed ranging from 0 to 100 points. Psychometric properties are  
20 good (34).  
21  
22  
23  
24  
25

### 26 27 28 *Short-Form -36-Item Health Survey*

29 The German Version of the Short-Form-36 (SF-36) by Bullinger and Kirchberger (1998) was used,  
30 which is a generic health survey comprising 36 items in eight subscales (physical functioning, role  
31 functioning physical, bodily pain, general health perceptions, vitality, social functioning, role  
32 functioning emotional and mental health). We subsumed each of the subscales into the domains  
33 'subjective physical well-being' and 'subjective psychological well-being', as appropriate (see table 1).  
34 The subscales can be aggregated into two component summary scores representing the physical  
35 summary scale and the mental summary scale, both of which we used in the domain 'quality of life'  
36 (see table 1). Subscale and summary scores range from 0 to 100, based on transformed z-scores with  
37 multiplication of the regression coefficients of the normative sample. A higher score indicates a  
38 better QoL. Psychometric properties are good (35).  
39  
40  
41  
42  
43  
44  
45

## 46 **Analysis**

47 IBM SPSS Statistics 23 was used for descriptive and inferential statistics. A p-value of  $\leq 0.05$  was  
48 considered statistically significant. Chi-square tests for dichotomous variables, t-tests and univariate  
49 analyses of variance were performed for exploratory group comparisons in all developmental  
50 domains (for an overview of developmental domains, see table 1). Univariate regressions were  
51 conducted for exploratory analyses of predictors of physical and psychological QoL.  
52  
53  
54  
55  
56  
57  
58  
59

## Results

### Sample characteristics

All 38 participants of the PHTX group underwent heart transplantation when they were children, with a mean age at time of transplantation of 10.95 years (SD=3.7). The mean age at time of recruitment was 22.11 years (SD=4.7), ranging from 16 to 35 years. Fifty percent of the patients were male. The mean waiting time for an organ was 0.47 years (SD=0.5). Number of years between PHTX and assessment was on average 11.16 years (SD=5.3), ranging from 4 to 23 years.

In the control group, mean age at assessment was 22.91 years (SD=1.8), ranging from 19 to 26 years; 45 percent were male.

Between groups, there are no significant differences in age ( $F(1,45,67) = 1.00, p = 0.285$ ) or gender ( $\chi^2(1, N=84) = 1.98, p=0.159$ ). Regarding the educational level, the control group was significantly more highly educated than the PHTX patients ( $t(80) = -16.313, p < 0.001$ , high school or university in 96% and 8%, respectively). Furthermore, the control group individuals reported being in a partnership more often than the PHTX patients ( $\chi^2(1, N=84) = 9.42, p = 0.002$ , 65% and 32%, respectively).

### Family

In this domain, we focused on the current living situation, spatial independence and relationship with the parents, with the following results: The living situation differs significantly between the PHTX and control group,  $t(46,19) = -2.22, p = 0.031$ . Twenty-one of the PHTX patients (55%) lived with their parents, while the remaining 45% had moved out. Of those 45%, 18% lived with their partner, 11% lived alone, 11% lived next to their parents in a separate apartment and 5% shared a flat. By contrast, only 22% of the control group lived with their parents, while 78% had moved out, see table 2.

In the subgroup of participants who no longer live with their parents, the distance to the parents' home in km differs significantly between the groups ( $F(1,26,0) = 45.57, p < 0.001$ ). The PHTX stay closer to their parents' house ( $M=1.66\text{km}, SD=1.26\text{km}$ ), while the healthy controls move further away ( $M=213.37\text{km}, SD=280.99\text{km}$ ).

The perceived quality of the relationship with their parents and self-estimated autonomy are reported differently in the two groups ( $F(1,57) = 5.72, p = 0.02$ ), with higher scores reported by the PHTX group than by the control group, indicating higher perceived quality of the relationship and perceived autonomy in the PHTX group, see table 2.

Table 2. Characteristics and metrics of family variables in the PHTX group and control group

| Characteristic | assessed by | Value        | PHTX (N=38) | Control group (N=46) | p     |
|----------------|-------------|--------------|-------------|----------------------|-------|
| Living         | Social      | With parents | 21 (55%)    | 10 (22%)             | 0.031 |

|                                  |                                  |                 |         |          |         |
|----------------------------------|----------------------------------|-----------------|---------|----------|---------|
| situation                        | demographic questionnaire        | With partner    | 7 (18%) | 9 (20%)  |         |
|                                  |                                  | Alone           | 4 (11%) | 10 (21%) |         |
|                                  |                                  | Next to parents | 4 (11%) | 0        |         |
|                                  |                                  | Flat share      | 2 (5%)  | 17 (37%) |         |
| Distance to parents' home in km  | Social demographic questionnaire | Mean            | 1.66    | 213.37   | < 0.001 |
|                                  |                                  | SD              | 1.26    | 280.99   |         |
| Relation to parents and autonomy | KIDSCREEN-27                     | Mean            | 59.15   | 53.49    | 0.020   |
|                                  |                                  | SD              | 9.27    | 7.78     |         |

### Education and profession

In this domain, we focused on the number of repeated school years, the educational level, employment situation and financial situation. The educational level differs significantly between the two groups ( $t(79) = -11.42, p < 0.001$ ): the PHTX patients less often completed high school education than healthy controls (52% and 96%, respectively), fewer of them were currently studying (3% and 62%, respectively) and a smaller percentage achieved an academic degree (5% and 33%, respectively). Three PHTX patients (8%) had dropped out of school, as opposed to no participants from the healthy control group. At school, the PHTX group had to repeat a grade significantly more often than the control group ( $\chi^2(1, N=80) = 20.53, p < 0.001$ ). Ten PHTX patients (26%) repeated one school year and three PHTX patients (8%) repeated two school years, while none of the control group repeated a school year.

The type of the current job also differs between the two groups ( $\chi^2(1, N=79) = 26.36, p < 0.001$ ), with PHTX patients having part-time jobs less often than the control group (9% and 34%, respectively). The PHTX group's occupations are distributed between jobs in full time (23%), training (11%), apprenticeship (17%), unemployed (23%), retired (11%), half time jobs (3%) or part time jobs (6%) and other (6%). The control group reported the following occupations: full time (5%), training (2%), apprenticeship (40%), unemployed (5%), half time jobs (2%), part time jobs (32%) and other (14%). Finally, sources of financial support differ between the groups ( $t(52.68) = 3.46, p=0.001$ ): sources of income are more widely distributed in PHTX patients, in comparison with the control group (see table 3). Thirty-four percent of the PHTX group reported being financially independent because of a paid job, as opposed to 64% of the control group. Furthermore, PHTX patients less often receive financial support from their parents than the control group ( $\chi^2(1, N=80) = 11.75, p = 0.001$ ).

Table 3.

Characteristics and metrics of school, apprenticeship and financial variables in PHTX and control group

| characteristics | Value | PHTX (N=38) | control group (N=46) | p |
|-----------------|-------|-------------|----------------------|---|
|-----------------|-------|-------------|----------------------|---|

|                                    |                                                |          |          |         |
|------------------------------------|------------------------------------------------|----------|----------|---------|
| Repeated years at school           | Yes                                            | 14 (37%) | 0        | < 0.001 |
|                                    | No                                             | 21 (55%) | 46       |         |
| Number of repeated years at school | 0                                              | 20 (53%) | 46       | < 0.001 |
|                                    | 1                                              | 10 (26%) | 0        |         |
|                                    | 2                                              | 3 (8%)   | 0        |         |
| Education level                    | Still attending school                         | 4 (10%)  | 0        | < 0.001 |
|                                    | No exam                                        | 3 (8%)   | 0        |         |
|                                    | School for children with learning difficulties | 5 (13%)  | 0        |         |
|                                    | Secondary school level                         | 22 (58%) | 1 (2%)   |         |
|                                    | A-level                                        | 1 (3%)   | 27 (59%) |         |
|                                    | College                                        | 1 (3%)   | 0        |         |
| Current job                        | University                                     | 1 (3%)   | 15 (33%) | < 0.001 |
|                                    | Full time                                      | 8 (21%)  | 2 (4%)   |         |
|                                    | Half time                                      | 1 (3%)   | 1 (2%)   |         |
|                                    | Part time                                      | 2 (5%)   | 14 (30%) |         |
|                                    | Training                                       | 4 (11%)  | 1 (2%)   |         |
|                                    | Apprenticeship                                 | 6 (16%)  | 18 (39%) |         |
|                                    | Unemployed                                     | 8 (21%)  | 2 (4%)   |         |
|                                    | Retired                                        | 4 (11%)  | 0        |         |
| Financial life (multiple choice)   | Other                                          | 2 (5%)   | 6 (13%)  | 0.001   |
|                                    | Own money via job                              | 13 (34%) | 30 (65%) |         |
|                                    | Parents/family members                         | 15 (39%) | 37 (80%) |         |
|                                    | Dole                                           | 5 (13%)  | 0        |         |
|                                    | Pension                                        | 8 (21%)  | 0        |         |
|                                    | Welfare                                        | 4 (11%)  | 0        |         |
|                                    | Others                                         | 4 (11%)  | 8 (17%)  |         |

### Partnership

In this domain, we focused on marital status, partner status and the duration of the longest relationship. The marital status differs significantly between the two groups ( $\chi^2 (1, N=84) = 14.34, p = 0.002$ ): 92% of the PHTX patients reported being single, 5% were married and 3% divorced. In comparison, 100% of the control group were single and none were married or divorced. In the subgroup of single participants, 65% of the PHTX patients and 32% of the control group reported having a partner ( $\chi^2 (1, N=84) = 9.42, p = 0.002$ ). The duration of the longest relationship does not differ between groups ( $F(1,75) = 1.52, p = 0.222$ ); see table 4 for an overview.

Table 4.

Characteristics and metrics of partnership in PHTX and control group

| Characteristics | Value    | PHTX (N=38) | Healthy controls (N=46) | p     |
|-----------------|----------|-------------|-------------------------|-------|
| Marital status  | Single   | 35 (92%)    | 46 (100%)               | 0.002 |
|                 | Divorced | 1 (3%)      | 0                       |       |
|                 | Married  | 2 (5%)      | 30 (65%)                |       |
|                 |          |             | 0                       |       |
| Partnership     | Yes      | 12 (32%)    | 30 (65%)                | 0.002 |

|                                              | No   | 26 (68%) | 16 (35%) |       |
|----------------------------------------------|------|----------|----------|-------|
| Duration of longest relationship (in months) | Mean | 23.45    | 31.67    | 0.222 |
|                                              | SD   | 25.81    | 29.36    |       |

### Social environment

In this domain, we focused on social support in general, social support by peers, feelings about school, re-integration after PHTX, as well as the self-rated social function, with the following results. The PHTX group was asked if re-integration at school after HTX was 'successful or not' (dichotomous variable) as part of the demographic questionnaire. Fifty-eight percent reported the reentry into school as not successful. The total score of the F-SozU differs between the groups ( $F(1,44.92) = 23.39$ ,  $p < 0.001$ ), with the control group reporting higher perceived social support than the PHTX group. On the KIDSCREEN-27 subscale 'social support by peers', the PHTX group scored lower than the control group ( $F(1,75) = 1.52$ ,  $p = 0.22$ ), indicating less perceived support by their peer group. On the SF-36 subscale 'social functioning', the PHTX group also scored lower than healthy controls ( $F(1,82) = 6.11$ ,  $p = 0.015$ ), indicating poorer social functioning, see table 5.

Table 5.  
Social support of PHTX patients and control group

| Characteristics         | Assessed by                      | Value          | PHTX (N=46) | control group (N=38) | P       |
|-------------------------|----------------------------------|----------------|-------------|----------------------|---------|
| Integration in school   | Social demographic questionnaire | Successful     | 16 (42%)    |                      |         |
|                         |                                  | Not successful | 22 (58%)    |                      |         |
| Social support          | F-SozU                           | Mean           | 4.31        | 4.77                 | < 0.001 |
|                         |                                  | SD             | 0.65        | 0.28                 |         |
| Social support by peers | KIDSCREEN-27                     | Mean           | 45.5        | 50.38                | 0.046   |
|                         |                                  | SD             | 10.98       | 7.39                 |         |
| Feelings about school   | KIDSCREEN-27                     | Mean           | 50.90       | 51.19                | 0.901   |
|                         |                                  | SD             | 9.47        | 6.37                 |         |
| Social functioning      | SF-36                            | Mean           | 80.59       | 91.03                | 0.022   |
|                         |                                  | SD             | 24.26       | 13.86                |         |

### Subjective well-being and quality of life

In this domain we focused on different aspects of subjective physical well-being (subjective physical complaints, physical functioning, general health, physical limits in everyday functioning, pain and physical well-being), psychological well-being (psychological well-being, vitality, social functioning and emotional limits in everyday functioning) as well as the physical and psychological QoL.

**Subjective physical well-being.** Subjective physical complaints, as assessed with the GBB total score, do not differ between the two groups ( $F(1,83) = 0.78$ ,  $p = 0.379$ ). On a subscale level, a significant difference was found on the subscale fatigue tendency ( $F(1,83) = 4.39$ ,  $p = 0.039$ ), with PHTX patients



1  
2  
3 reporting more fatigue symptoms than the control group (M=3.0, SD=2.79 and M=1.91, SD=1.95,  
4 respectively). No differences were found on the subscales of gastric complaints, limb pain or heart  
5 complaints. On the subscale physical well-being of the Kidscreen-27, no significant difference was  
6 observed between groups ( $t(60) = -1.91, p = 0.06$ ).

7  
8  
9  
10 **Subjective psychological well-being.** No significant difference on the Kidscreen-27 subscale  
11 'psychological well-being' was observed between groups ( $t(60) = -1.98, p = 0.052$ ).

12  
13  
14  
15 **QoL.** The PHTX patients reported a lower level of physical QoL based on the physical summary scale  
16 of the SF-36 than the control group ( $F(1,43.54) = 14.51, p < 0.001$ ). Also, the PHTX patients scored  
17 lower in all physical subscales than the control group (physical functioning:  $F(1,82)=21.69, p<0.001$ ;  
18 role physical:  $F(1,78)=7.92, p=0.006$ ; bodily pain:  $F(1,82)=6.04, p=0.016$ ; general health:  $F(1,78)=4.9,$   
19  $p=0.03$ ) (see figure 1).

20  
21  
22  
23  
24  
25 However, the PHTX patients showed no differences in psychological QoL, based on the mental  
26 summary scale of the SF-36 ( $F(1,76) = 0.15, p = 0.70$ ). On the subscale-level, only 'social functioning'  
27 differed between the groups ( $F(1,82) = 6.11, p = 0.015$ ), with a lower score reported by the PHTX  
28 patients (see figure 2).

### 29 30 31 32 **Predictors of physical and mental quality of life in PHTX patients**

33 To explore which factors predict QoL (psychological and physical) in PHTX patients, we correlated all  
34 variables (from the domains family, education and profession, partnership, social environment and  
35 subjective well-being) with the physical and psychological component summary scores of the SF-36  
36 as a first step. Based on significant exploratory correlations, variables were then selected as  
37 predictors for each of the two scales. Regression assumptions were checked and met for both  
38 regressions. Next, we calculated two stepwise univariate regression models (one for each summary  
39 scale of the SF-36). Variables were included stepwise as independent variables in the regression  
40 model. In order to avoid overfitting the model, all SF-36 subscales comprising the physical QoL  
41 component were excluded from the regression analysis, with the physical summary scale as criterion.  
42 All SF-36 subscales comprising psychological QoL were excluded from the analysis, with the mental  
43 summary scale as criterion.

#### 44 45 46 47 48 49 50 **Predictors of physical quality of life**

51 The following predictors were entered in the first regression model, with physical QoL entered as  
52 criterion: 1) school re-integration ( $r=0.497, p=0.01$ ); 2) physical complaints ( $r=-0.381, p=0.035$ ); 3)  
53 vitality ( $r= 0.369, p=0.041$ ); 4) social support by peers ( $r=0.771, p<0.001$ ); and 5) subjective physical  
54 and psychological well-being ( $r=0.595, p=0.012$ ; respectively  $r =0.520, p=0.033$ ). The analyses



revealed that better social support by peers (comprising, for instance, the items 'have you spent time with your friends?' or 'have you and your friends helped each other') predicts a higher physical QoL in PHTX patients, explaining 58.9% of variance ( $p=0.001$ ). See table 6 for the full regression model.

### Predictors of psychological QoL

The following predictors were entered in the second regression model, with psychological QoL as criterion: 1) duration of longest relationship ( $r=-0.455$ ,  $p=0.022$ ); 2) distance from parents' home ( $r=-0.443$ ,  $p=0.013$ ); physical complaints ( $r=-0.491$ ,  $p=0.005$ ); 3) role physical ( $r=0.498$ ,  $p=0.005$ ) and 4) subjective psychological well-being ( $r=0.683$ ,  $p=0.003$ ). The analysis revealed two significant predictors: fewer physical complaints and a better role functioning predicted better psychological QoL in PHTX patients, explaining 89.0% of variance ( $p<0.001$ ). See table 6 for the best fitting model.

Table 6.  
Stepwise linear univariate regression model: predictors of QoL (n=38)

| Criterion    | Predictor                               | B     | SE    | p     | 95% C.I. for B |       |
|--------------|-----------------------------------------|-------|-------|-------|----------------|-------|
|              |                                         |       |       |       | Lower          | Upper |
| Physical QoL | Peers (KIDSCREEN-27)                    | 0.65  | 0.15  | 0.001 | 0.34           | 0.96  |
|              | Constant                                | 20.73 | 6.95  | 0.001 | 5.81           | 35.64 |
| Mental QoL   | Physical Complaints (GBB)               | -0.33 | 0.09  | 0.007 | -0.54          | -0.12 |
|              | Role Physical (physical subscale SF-36) | 0.26  | 0.10  | 0.036 | 0.02           | 0.51  |
|              | Constant                                | 28.79 | 10.37 | 0.027 | 4.27           | 53.31 |

## Discussion

In this study, we explored developmental tasks of emerging adulthood in a sample of young adults after PHTX in an exploratory manner. The following categories were examined: a) family (current living situation, spatial independence, relationship with the parents) b) education and profession (educational level, repeated school years, employment situation, financial situation) c) partnership (marital status, partner status and duration of longest relationship) and d) social environment (perceived social support in general, by peers, feelings about school, social functioning, and re-integration at school after PHTX). Additionally, subjective physical well-being, subjective psychological well-being and QoL (physical and psychological) were assessed. Finally, we investigated which of the variables from domains a-d, as well as variables from the domains subjective physical and psychological well-being predict self-reported QoL.

In comparison to our control group, PHTX patients more often live with their parents and when they move out, they stay in closer proximity to their parents. We found no differences in the perceived quality of the relationship with the parents.

1  
2  
3 When it comes to financial independence, the PHTX patients rely less on their family for financial  
4 support than the control group. PHTX patients held full-time positions more frequently than the  
5 control group, while healthy controls more often chose part time work. Importantly, a significant  
6 percentage of PHTX patients had no job and/or received a pension. As PHTX patients more frequently  
7 had to repeat at least one school year, probably due to health problems and hospital stays, the  
8 choice of full-time work, which might reflect the choice for non-academic career paths, might be  
9 related to more academic difficulties related to their disease. Future studies should focus on this  
10 issue, systematically investigating academic disadvantages and choices due to underlying disease and  
11 the challenges that come with PHTX.  
12

13  
14  
15  
16  
17 When it comes to partnership, more PHTX patients reported being single than healthy individuals  
18 from the control group, even though the groups did not differ in age. However, the duration of the  
19 longest relationship did not differ between groups. This finding might be due to difficulties in  
20 initiating partnership, while partnership stability is not compromised in PHTX patients once they have  
21 found a partner. PHTX patients in our sample reported less perceived social support in general and  
22 by their peers. Social contacts are of great importance for teenagers and young adults. Facilitating  
23 social relationships in order to increase well-being and QoL of this vulnerable group might be an  
24 important goal for psychosocial reintegration in patients after PHTX. Future studies should take a  
25 closer look at social relationships in this group, focusing on number of social relationships, as well as  
26 quality and stability of their social networks.  
27

28  
29  
30  
31  
32 PHTX patients reported a higher fatigue tendency than the control group, while no differences were  
33 found in other areas of physical complaints. Symptoms of fatigue might limit PHTX patients' activities  
34 in daily life and hinder participation in social life, leisure activities etc. This finding also warrants  
35 further investigation.  
36

37  
38  
39 PHTX patients reported equal psychological well-being to the control group, which is a favorable  
40 result. However, they did report lower a physical QoL. In our exploratory regression models, we  
41 found that better perceived social support by peers predicts a better physical QoL, with a high  
42 proportion of explained variance. While these results further emphasize the importance of peer  
43 relations in this age group, the relationship between physical well-being and peer relations should be  
44 investigated further. Finally, we found that fewer physical complaints predict a better mental QoL,  
45 also with a large proportion of explained variance. In sum, PHTX patients fare well when it comes to  
46 their financial autonomy, relationship with their parents and profession, while they only rarely  
47 choose an academic career. They report lower social support in general and from peers and have  
48 more physical complaints (fatigue tendency), as well as reduced physical QoL, which both seem to be  
49 intertwined with social support from peers. While, on average, their mental well-being is comparable  
50  
51  
52  
53  
54  
55  
56  
57  
58  
59  
60

1  
2  
3 to that of the control group, fewer physical complaints predict higher scores on the mental well-  
4 being scale, also pointing to the key role of their physical health for other domains of functioning.  
5  
6 Importantly, this study is cross-sectional and exploratory and the results should be cautiously  
7 interpreted. Future studies investigating developmental challenges of PHTX patients during emerging  
8 adulthood should be longitudinal, in order to shed light on psychosocial adjustment after PHTX  
9 across time. Control groups should be carefully matched according to key variables, while hypotheses  
10 should be carefully developed and tested in a confirmatory manner.  
11  
12  
13  
14

#### 15 Acknowledgment

16 The authors thank all participants for being a part of this study. The authors thank Anne Gale for  
17 editorial assistance and Julia Stein for statistical advice.  
18  
19  
20

#### 21 Conflict of interests

22 None  
23  
24  
25

#### 26 Author's contribution

27 Maria Sepke and Wolfgang Albert made substantial contributions to the conception and design of  
28 the work. Maria Sepke and Hannah Ferentzi contributed to manuscript drafting and editing. Maria  
29 Sepke, Hannah Ferentzi, Vera Disselhoff and Wolfgang Albert reviewed the protocol and made  
30 amendments. All authors critically reviewed and approved the final version. All authors agree to be  
31 accountable for all aspects of the work.  
32  
33  
34  
35  
36

#### 37 Data statement section

38 We plan to publish the raw data with 'Dryad' when data sharing is desired.  
39  
40  
41

#### 42 Funding

43 This research received no specific grant from any funding agency in the public, commercial or not-  
44 for-profit sectors.'  
45  
46  
47

#### 48 Figure legend

49  
50 Figure 1. Means of z-transformed scores of the SF-36 physical summary scale and all physical  
51 subscales raw values 0–100 of PHTX and control group.  
52

53 Figure 2. Means of z-transformed scores of the SF-36 mental summary scale and all psychological  
54 subscales raw values 0–100 of PHTX and control group.  
55  
56  
57  
58

## References

1. Kirkin J. Current challenges in pediatric heart transplantation for congenital heart disease. *Current Opinion in Organ Transplantation*. 2015;20(5):577-83.
2. Rossano JW, Cherikh WS, Chambers DC, Goldfarb S, Khush K, Kucheryavaya AY, et al. The Registry of the International Society for Heart and Lung Transplantation: Twentieth Pediatric Heart Transplantation Report-2017; Focus Theme: Allograft ischemic time. *J Heart Lung Transplant*. 2017 Oct;36(10):1060-9.
3. Rossano JW, Dipchand AI, Edwards LB, Goldfarb S, Kucheryavaya AY, Levvey Rn BJ, et al. The Registry of the International Society for Heart and Lung Transplantation: Nineteenth Pediatric Heart Transplantation Report-2016; Focus Theme: Primary Diagnostic Indications for Transplant. *J Heart Lung Transplant*. 2016 Oct;35(10):1185-95.
4. ISHLT. 2017; Available from: <http://www.isHLT.org/registries/>.
5. Dipchand AI, Kirk R, Edwards LB, Kucheryavaya AY, Benden C, Christie JD, et al. The Registry of the International Society for Heart and Lung Transplantation: Sixteenth Official Pediatric Heart Transplantation Report--2013; focus theme: age. *J Heart Lung Transplant*. 2013 Oct;32(10):979-88.
6. Thrush PT, Hoffman TM. Pediatric heart transplantation-indications and outcomes in the current era. *J Thorac Dis*. 2014 Aug;6(8):1080-96.
7. Dipchand AI, Edwards LB, Kucheryavaya AY, Benden C, Dobbels F, Levvey BJ, et al. The registry of the International Society for Heart and Lung Transplantation: seventeenth official pediatric heart transplantation report--2014; focus theme: retransplantation. *J Heart Lung Transplant*. 2014 Oct;33(10):985-95.
8. ISHLT. ISHLT Transplant Registry Quarterly Reports for Heart in Europe 2018; Available from: [http://www.isHLT.org/registries/quarterlyDataReportResults.asp?organ=HR&rptType=recip\\_p\\_surv&continent=3](http://www.isHLT.org/registries/quarterlyDataReportResults.asp?organ=HR&rptType=recip_p_surv&continent=3).
9. Tonsho M, Michel S, Ahmed Z, Alessandrini A, Madsen JC. Heart transplantation: challenges facing the field. *Cold Spring Harb Perspect Med*. 2014 May 1;4(5).
10. Pinquart M, Shen Y. Behavior problems in children and adolescents with chronic physical illness: a meta-analysis. *J Pediatr Psychol*. 2011 Oct;36(9):1003-16.
11. Pinquart M, Shen Y. Anxiety in children and adolescents with chronic physical illnesses: a meta-analysis. *Acta Paediatr*. 2011 Aug;100(8):1069-76.
12. Pinquart M, Shen Y. Depressive symptoms in children and adolescents with chronic physical illness: an updated meta-analysis. *J Pediatr Psychol*. 2011 May;36(4):375-84.
13. Calsbeek H, Rijken M, Bekkers MJ, Kerssens JJ, Dekker J, van Berge Henegouwen GP. Social position of adolescents with chronic digestive disorders. *Eur J Gastroenterol Hepatol*. 2002 May;14(5):543-9.
14. Lindsay S. Employment status and work characteristics among adolescents with disabilities. *Disabil Rehabil*. 2011;33(10):843-54.
15. Maslow GR, Haydon A, McRee AL, Ford CA, Halpern CT. Growing up with a chronic illness: social success, educational/vocational distress. *J Adolesc Health*. 2011 Aug;49(2):206-12.
16. Stam H, Hartman EE, Deurloo JA, Groothoff J, Grootenhuis MA. Young adult patients with a history of pediatric disease: impact on course of life and transition into adulthood. *J Adolesc Health*. 2006 Jul;39(1):4-13.
17. Peng DM, Zhang Y, Rosenthal DN, Palmon M, Chen S, Kaufman BD, et al. Impact of Heart Transplantation on the Functional Status of US Children With End-Stage Heart Failure. *Circulation*. 2017 Mar 7;135(10):939-50.
18. DeMaso DR, Twente AW, Spratt EG, O'Brien P. Impact of psychologic functioning, medical severity, and family functioning in pediatric heart transplantation. *J Heart Lung Transplant*. 1995 Nov-Dec;14(6 Pt 1):1102-8.
19. Uzark KC, Sauer SN, Lawrence KS, Miller J, Addonizio L, Crowley DC. The psychosocial impact of pediatric heart transplantation. *J Heart Lung Transplant*. 1992 Nov-Dec;11(6):1160-7.

- 1
  - 2
  - 3
  - 4
  - 5
  - 6
  - 7
  - 8
  - 9
  - 10
  - 11
  - 12
  - 13
  - 14
  - 15
  - 16
  - 17
  - 18
  - 19
  - 20
  - 21
  - 22
  - 23
  - 24
  - 25
  - 26
  - 27
  - 28
  - 29
  - 30
  - 31
  - 32
  - 33
  - 34
  - 35
  - 36
  - 37
  - 38
  - 39
  - 40
  - 41
  - 42
  - 43
  - 44
  - 45
  - 46
  - 47
  - 48
  - 49
  - 50
  - 51
  - 52
  - 53
  - 54
  - 55
  - 56
  - 57
  - 58
  - 59
  - 60
20. Wray J, Radley-Smith R. Longitudinal assessment of psychological functioning in children after heart or heart-lung transplantation. *J Heart Lung Transplant*. 2006 Mar;25(3):345-52.
21. Kollner V, Einsle F, Schade I, Maulhardt T, Gulielmos V, Joraschky P. The influence of anxiety, depression and post traumatic stress disorder on quality of life after thoracic organ transplantation. *Z Psychosom Med Psychother*. 2003;49(3):262-74.
22. Wray J, Radley-Smith R. Beyond the first year after pediatric heart or heart-lung transplantation: Changes in cognitive function and behaviour. *Pediatr Transplant*. 2005 Apr;9(2):170-7.
23. Choudhry S, Dharnidharka VR, Castleberry CD, Goss CW, Simpson KE, Schechtman KB, et al. End-stage renal disease after pediatric heart transplantation: A 25-year national cohort study. *J Heart Lung Transplant*. 2017 Oct 2.
24. Rostad CA, Wehrheim K, Kirklin JK, Naftel D, Pruitt E, Hoffman TM, et al. Bacterial infections after pediatric heart transplantation: Epidemiology, risk factors and outcomes. *J Heart Lung Transplant*. 2017 Sep;36(9):996-1003.
25. Copeland H, Razzouk A, Beckham A, Chinnock R, Hasaniya N, Bailey L. Social framework of pediatric heart recipients who have survived more than 15 post-transplant years: A single-center experience. *Pediatr Transplant*. 2017 Mar;21(2).
26. Hollander SA, Chen S, Luikart H, Burge M, Hollander AM, Rosenthal DN, et al. Quality of life and metrics of achievement in long-term adult survivors of pediatric heart transplant. *Pediatr Transplant*. 2015 Feb;19(1):76-81.
27. Mackie AS, Rempel GR, Islam S, Rankin K, McCurdy C, Vonder Muhll I, et al. Psychosocial Maturity, Autonomy, and Transition Readiness among Young Adults with Congenital Heart Disease or a Heart Transplant. *Congenit Heart Dis*. 2016 Mar-Apr;11(2):136-43.
28. Arnett JJ. Emerging adulthood. A theory of development from the late teens through the twenties. *Am Psychol*. 2000 May;55(5):469-80.
29. Havighurst RJ, editor. *Developmental tasks and education*. Chicago: University of Chicago Press 1948.
30. Rauer AJ, Pettit GS, Lansford JE, Bates JE, Dodge KA. Romantic relationship patterns in young adulthood and their developmental antecedents. *Dev Psychol*. 2013 Nov;49(11):2159-71.
31. Taylor SJ, Barker LA, Heavey L, McHale S. The typical developmental trajectory of social and executive functions in late adolescence and early adulthood. *Dev Psychol*. 2013 Jul;49(7):1253-65.
32. White-Williams C, Grady KL, Naftel DC, Myers S, Wang E, Rybarczyk B. The relationship of socio-demographic factors and satisfaction with social support at five and 10 yr after heart transplantation. *Clin Transplant*. 2013 Mar-Apr;27(2):267-73.
33. Fydrich T, Sommer G, Brähler E. F-SozU - Social support questionnaire. Brähler E, Schumacher J, Strauß B, editors. Göttingen: Hogrefe; 2002.
34. Ravens-Sieberer U, Gosch A, Rajmil L, Erhart M, Bruil J, Duer W, et al. KIDSCREEN-52 quality-of-life measure for children and adolescents. *Expert Rev Pharmacoecon Outcomes Res*. 2005 Jun;5(3):353-64.
35. Bullinger M, Kirchberger I. SF-36. Fragebogen zum Gesundheitszustand. Handanweisung. Göttingen: Hogrefe; 1998.

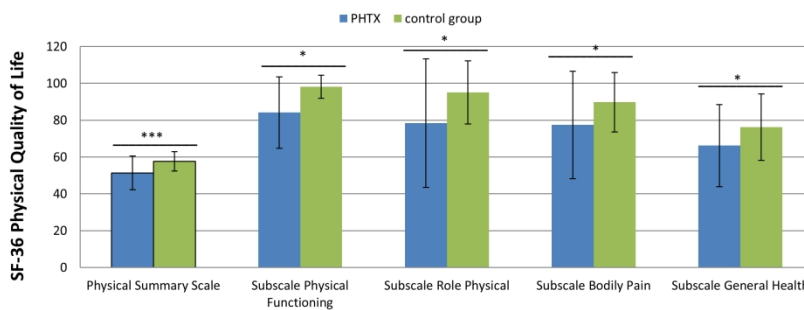

Figure 1. Means of z-transformed scores of the SF-36 physical summary scale and all physical subscales raw values 0–100 of PHTX and control group.

254x190mm (300 x 300 DPI)

1  
2  
3  
4  
5  
6  
7  
8  
9  
10  
11  
12  
13  
14  
15  
16  
17  
18  
19  
20  
21  
22  
23  
24  
25  
26  
27  
28  
29  
30  
31  
32  
33  
34  
35  
36  
37  
38  
39  
40  
41  
42  
43  
44  
45  
46  
47  
48  
49  
50  
51  
52  
53  
54  
55  
56  
57  
58  
59  
60

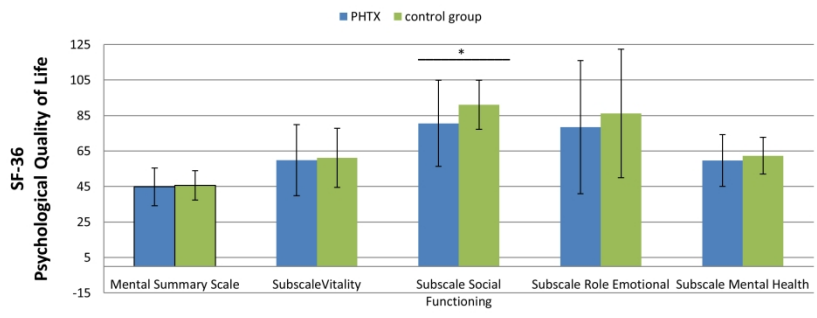

Figure 2. Means of z-transformed scores of the SF-36 mental summary scale and all psychological subscales raw values 0–100 of PHTX and control group.

254x190mm (300 x 300 DPI)

# Reporting checklist for case-control study.

Based on the STROBE case-control guidelines.

## Instructions to authors

Complete this checklist by entering the page numbers from your manuscript where readers will find each of the items listed below.

Your article may not currently address all the items on the checklist. Please modify your text to include the missing information. If you are certain that an item does not apply, please write "n/a" and provide a short explanation.

Upload your completed checklist as an extra file when you submit to a journal.

In your methods section, say that you used the STROBE case-control reporting guidelines, and cite them as:

von Elm E, Altman DG, Egger M, Pocock SJ, Gøtzsche PC, Vandenbroucke JP. The Strengthening the Reporting of Observational Studies in Epidemiology (STROBE) Statement: guidelines for reporting observational studies.

|                        |     | Reporting Item                                                                                                                  | Page Number |
|------------------------|-----|---------------------------------------------------------------------------------------------------------------------------------|-------------|
| Title                  | #1a | Indicate the study's design with a commonly used term in the title or the abstract                                              | 1           |
| Abstract               | #1b | Provide in the abstract an informative and balanced summary of what was done and what was found                                 | 2           |
| Background / rationale | #2  | Explain the scientific background and rationale for the investigation being reported                                            | 4           |
| Objectives             | #3  | State specific objectives, including any prespecified hypotheses                                                                | 5           |
| Study design           | #4  | Present key elements of study design early in the paper                                                                         | 5           |
| Setting                | #5  | Describe the setting, locations, and relevant dates, including periods of recruitment, exposure, follow-up, and data collection | 5           |
| Eligibility criteria   | #6a | Give the eligibility criteria, and the sources and methods of case ascertainment and control selection. Give the rationale      | 5           |



|    |                  |                                                                        |     |
|----|------------------|------------------------------------------------------------------------|-----|
| 1  |                  | for the choice of cases and controls. For matched studies, give        |     |
| 2  |                  | matching criteria and the number of controls per case                  |     |
| 3  |                  |                                                                        |     |
| 4  |                  | #6b For matched studies, give matching criteria and the number of      | n/a |
| 5  |                  | controls per case                                                      |     |
| 6  |                  |                                                                        |     |
| 7  |                  |                                                                        |     |
| 8  |                  | #7 Clearly define all outcomes, exposures, predictors, potential       | 7   |
| 9  |                  | confounders, and effect modifiers. Give diagnostic criteria, if        |     |
| 10 |                  | applicable                                                             |     |
| 11 |                  |                                                                        |     |
| 12 |                  |                                                                        |     |
| 13 | Data sources /   | #8 For each variable of interest give sources of data and details of   | 6   |
| 14 | measurement      | methods of assessment (measurement). Describe                          |     |
| 15 |                  | comparability of assessment methods if there is more than one          |     |
| 16 |                  | group. Give information separately for cases and controls.             |     |
| 17 |                  |                                                                        |     |
| 18 |                  |                                                                        |     |
| 19 |                  |                                                                        |     |
| 20 | Bias             | #9 Describe any efforts to address potential sources of bias           | n/a |
| 21 |                  |                                                                        |     |
| 22 | Study size       | #10 Explain how the study size was arrived at                          | 5   |
| 23 |                  |                                                                        |     |
| 24 | Quantitative     | #11 Explain how quantitative variables were handled in the             | 6   |
| 25 | variables        | analyses. If applicable, describe which groupings were                 |     |
| 26 |                  | chosen, and why                                                        |     |
| 27 |                  |                                                                        |     |
| 28 |                  |                                                                        |     |
| 29 |                  |                                                                        |     |
| 30 | Statistical      | #12a Describe all statistical methods, including those used to control | 7   |
| 31 | methods          | for confounding                                                        |     |
| 32 |                  |                                                                        |     |
| 33 |                  |                                                                        |     |
| 34 |                  | #12b Describe any methods used to examine subgroups and                | 7   |
| 35 |                  | interactions                                                           |     |
| 36 |                  |                                                                        |     |
| 37 |                  |                                                                        |     |
| 38 |                  | #12c Explain how missing data were addressed                           | 7   |
| 39 |                  |                                                                        |     |
| 40 |                  | #12d If applicable, explain how matching of cases and controls was     | 7   |
| 41 |                  | addressed                                                              |     |
| 42 |                  |                                                                        |     |
| 43 |                  |                                                                        |     |
| 44 |                  | #12e Describe any sensitivity analyses                                 | 7   |
| 45 |                  |                                                                        |     |
| 46 | Participants     | #13a Report numbers of individuals at each stage of study—eg           | 7   |
| 47 |                  | numbers potentially eligible, examined for eligibility, confirmed      |     |
| 48 |                  | eligible, included in the study, completing follow-up, and             |     |
| 49 |                  | analysed. Give information separately for cases and controls.          |     |
| 50 |                  |                                                                        |     |
| 51 |                  |                                                                        |     |
| 52 |                  |                                                                        |     |
| 53 |                  | #13b Give reasons for non-participation at each stage                  | 7   |
| 54 |                  |                                                                        |     |
| 55 |                  | #13c Consider use of a flow diagram                                    | n/a |
| 56 |                  |                                                                        |     |
| 57 | Descriptive data | #14a Give characteristics of study participants (eg demographic,       | 7   |
| 58 |                  |                                                                        |     |
| 59 |                  |                                                                        |     |
| 60 |                  |                                                                        |     |

|    |                  |                                                                        |       |
|----|------------------|------------------------------------------------------------------------|-------|
| 1  |                  | clinical, social) and information on exposures and potential           |       |
| 2  |                  | confounders. Give information separately for cases and                 |       |
| 3  |                  | controls                                                               |       |
| 4  |                  |                                                                        |       |
| 5  |                  |                                                                        |       |
| 6  |                  | #14b Indicate number of participants with missing data for each        | n/a   |
| 7  |                  | variable of interest                                                   |       |
| 8  |                  |                                                                        |       |
| 9  | Outcome data     | #15 Report numbers in each exposure category, or summary               | 7-11  |
| 10 |                  | measures of exposure. Give information separately for cases            |       |
| 11 |                  | and controls                                                           |       |
| 12 |                  |                                                                        |       |
| 13 |                  |                                                                        |       |
| 14 | Main results     | #16a Give unadjusted estimates and, if applicable, confounder-         | 7-11  |
| 15 |                  | adjusted estimates and their precision (eg, 95% confidence             |       |
| 16 |                  | interval). Make clear which confounders were adjusted for and          |       |
| 17 |                  | why they were included                                                 |       |
| 18 |                  |                                                                        |       |
| 19 |                  |                                                                        |       |
| 20 |                  |                                                                        |       |
| 21 |                  | #16b Report category boundaries when continuous variables were         | 7-11  |
| 22 |                  | categorized                                                            |       |
| 23 |                  |                                                                        |       |
| 24 |                  |                                                                        |       |
| 25 |                  | #16c If relevant, consider translating estimates of relative risk into | 7-11  |
| 26 |                  | absolute risk for a meaningful time period                             |       |
| 27 |                  |                                                                        |       |
| 28 |                  |                                                                        |       |
| 29 | Other analyses   | #17 Report other analyses done—e.g., analyses of subgroups and         | n/a   |
| 30 |                  | interactions, and sensitivity analyses                                 |       |
| 31 |                  |                                                                        |       |
| 32 |                  |                                                                        |       |
| 33 | Key results      | #18 Summarise key results with reference to study objectives           | 11    |
| 34 |                  |                                                                        |       |
| 35 | Limitations      | #19 Discuss limitations of the study, taking into account sources of   | 12    |
| 36 |                  | potential bias or imprecision. Discuss both direction and              |       |
| 37 |                  | magnitude of any potential bias.                                       |       |
| 38 |                  |                                                                        |       |
| 39 |                  |                                                                        |       |
| 40 | Interpretation   | #20 Give a cautious overall interpretation considering objectives,     | 11-12 |
| 41 |                  | limitations, multiplicity of analyses, results from similar studies,   |       |
| 42 |                  | and other relevant evidence.                                           |       |
| 43 |                  |                                                                        |       |
| 44 |                  |                                                                        |       |
| 45 | Generalisability | #21 Discuss the generalisability (external validity) of the study      | 12    |
| 46 |                  | results                                                                |       |
| 47 |                  |                                                                        |       |
| 48 |                  |                                                                        |       |
| 49 | Funding          | #22 Give the source of funding and the role of the funders for the     | 13    |
| 50 |                  | present study and, if applicable, for the original study on which      |       |
| 51 |                  | the present article is based                                           |       |
| 52 |                  |                                                                        |       |
| 53 |                  |                                                                        |       |
| 54 |                  |                                                                        |       |

The STROBE checklist is distributed under the terms of the Creative Commons Attribution License CC-BY. This checklist was completed on 16. February 2018 using <http://www.goodreports.org/>, a tool made by the [EQUATOR Network](#) in collaboration with [Penelope.ai](#)

# BMJ Open

## Exploring the developmental tasks of emerging adults after pediatric heart transplantation- a cross-sectional case control study

|                                 |                                                                                                                                                                                                                                                                                                                                                                                                                                                                                                                                                                                                                                              |
|---------------------------------|----------------------------------------------------------------------------------------------------------------------------------------------------------------------------------------------------------------------------------------------------------------------------------------------------------------------------------------------------------------------------------------------------------------------------------------------------------------------------------------------------------------------------------------------------------------------------------------------------------------------------------------------|
| Journal:                        | <i>BMJ Open</i>                                                                                                                                                                                                                                                                                                                                                                                                                                                                                                                                                                                                                              |
| Manuscript ID                   | bmjopen-2018-022461.R1                                                                                                                                                                                                                                                                                                                                                                                                                                                                                                                                                                                                                       |
| Article Type:                   | Research                                                                                                                                                                                                                                                                                                                                                                                                                                                                                                                                                                                                                                     |
| Date Submitted by the Author:   | 06-Aug-2018                                                                                                                                                                                                                                                                                                                                                                                                                                                                                                                                                                                                                                  |
| Complete List of Authors:       | Sepke, Maria; German Heart Center Berlin, Unit for Psychosomatic Medicine, Department of Cardiothoracic and Vascular Surgery; Steinbeis-Hochschule Berlin, Steinbeis Transfer Institute Medical Psychology<br>Ferentzi, Hannah; German Heart Center Berlin, Department of Congenital Heart Disease- Pediatric Cardiology<br>Disselhoff, Vera; Steinbeis-Hochschule Berlin, Steinbeis Transfer Institute Medical Psychology<br>Albert, Wolfgang; German Heart Center Berlin, Unit for Psychosomatic Medicine, Department of Cardiothoracic and Vascular Surgery; Steinbeis-Hochschule Berlin, Steinbeis Transfer Institute Medical Psychology |
| <b>Primary Subject Heading</b>: | Cardiovascular medicine                                                                                                                                                                                                                                                                                                                                                                                                                                                                                                                                                                                                                      |
| Secondary Subject Heading:      | Paediatrics, Mental health, Global health                                                                                                                                                                                                                                                                                                                                                                                                                                                                                                                                                                                                    |
| Keywords:                       | heart transplantation, developmental tasks, Paediatric cardiology < CARDIOLOGY, Quality of Life, psychosocial                                                                                                                                                                                                                                                                                                                                                                                                                                                                                                                                |
|                                 |                                                                                                                                                                                                                                                                                                                                                                                                                                                                                                                                                                                                                                              |

SCHOLARONE™  
Manuscripts

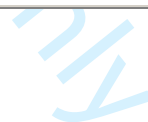

1  
2  
3  
4  
5 **Exploring the developmental tasks of emerging adults after pediatric**  
6 **heart transplantation- a cross-sectional case control study**  
7  
8  
9  
10

11 Maria Sepke<sup>1,2,3</sup>, Hannah Ferentzi<sup>4</sup>, Vera Stéphanie Umutoni Disselhoff<sup>3</sup>, Wolfgang Albert<sup>1,3,5</sup>

12  
13 1 Unit for Psychosomatic Medicine, Department of Cardiothoracic and Vascular Surgery, German Heart  
14 Center Berlin, Augustenburger Platz 1, 13353 Berlin, Germany

15  
16 2 Charité – Universitätsmedizin Berlin, corporate member of Freie Universität Berlin, Humboldt-  
17 Universität zu Berlin, and Berlin Institute of Health; Charitéplatz 1, 10117 Berlin, Germany

18  
19 3 Steinbeis Transfer Institute Medical Psychology, Steinbeis Hochschule Berlin, Augustenburger Platz 1,  
20 13353 Berlin, Germany

21  
22 4 Department of Congenital Heart Disease- Pediatric Cardiology, German Heart Center Berlin, Berlin,  
23 Germany

24  
25 5 DZHK (German Center for Cardiovascular Research), Partner Site Berlin, Oudenarder Str. 16, 13347  
26 Berlin, Germany

27  
28  
29  
30  
31  
32  
33  
34  
35  
36 Corresponding Author:

37  
38 Maria Sepke  
39 Augustenburger Platz 1  
40 13353 Berlin, Germany

41  
42 maria.sepke@gmx.de  
43 phone: +49 176 316 208 12  
44  
45  
46  
47

48  
49 Keywords: heart transplantation, developmental tasks, emerging adults, pediatric, psychosocial  
50  
51

52  
53 Word count: 4.054 (excluding the title page, abstract, references, tables, boxes, or figures)  
54  
55  
56  
57  
58

## Abstract

### Objective

Pediatric heart transplantation (PHTX) comprises 12% of all cardiac transplants and many of the children now survive into adulthood. Only a few studies have investigated the long-term psychosocial well-being of young adult patients after PHTX; no studies have investigated developmental tasks of emerging adulthood in different domains (family, social environment, education and profession, partnership, social environment).

### Setting

Specialized heart center in Germany.

### Participants

Thirty-eight young adults aged 22.11 years (SD=4.7) who underwent PHTX and a control group of 46 participants with no known chronic diseases, aged 22.91 years (SD=1.8), participated in the study.

### Outcome measures

All participants completed the following questionnaires: sociodemographic, the F-SozU, to measure perceived social support, the GBB to measure subjective complaints experienced by patients, the KIDSCREEN-27 to measure well-being, and the SF-36 to measure health-related quality of life (QoL).

### Results

'Family': the quality of the relationship with the parents was found to be equal in both groups, while PHTX patients stayed in closer spatial proximity to their parents. 'Social environment': PHTX patients reported lower social support by peers than the control group. 'Education and profession': PHTX patients most often worked full-time (23%), had no job and/or received a pension (21%). In comparison, most of the healthy controls did an apprenticeship (40%) and/or worked part time (32%). 'Partnership': fewer of the PHTX patients had a partner than the control group while relationship duration did not differ. In exploratory regression analyses, social support by peers predicted physical QoL, whereas physical complaints and the physical role predicted mental QoL in PHTX patients.

### Conclusions

Our exploratory findings highlight important similarities and differences in specific developmental tasks between PHTX patients and healthy controls. Future studies should focus on developmental tasks of PHTX patients in this age group more systematically, investigating their role in physical and mental well-being in a confirmatory manner.

1  
2  
3  
4  
5  
6  
7  
8  
9  
10  
11  
12  
13  
14  
15  
16  
17  
18  
19  
20  
21  
22  
23  
24  
25  
26  
27  
28  
29  
30  
31  
32  
33  
34  
35  
36  
37  
38  
39  
40  
41  
42  
43  
44  
45  
46  
47  
48  
49  
50  
51  
52  
53  
54  
55  
56  
57  
58  
59  
60

### Strengths and limitations

- To our knowledge, this study is one of the first to investigate the developmental tasks in the specific group of emerging adults after PHTX to have theoretical implications and which is relevant to the psychosocial care of these patients.

- This is a hypothesis-generating study with the unique approach of using well-established questionnaires for the exploration of developmental domains.

- This study is cross-sectional, so no inferences can be made with regard to development over time.

A convenience sample control group was used, which limits generalizability of the results.

- As this was an exploratory study, results should be replicated in confirmatory manner, based on carefully developed hypotheses.

## Introduction

Pediatric heart transplantation (PHTX) is an established therapy for end-stage cardiac disease (1) and has increased worldwide to more than 12,000 reported transplants in children since the first procedure in 1967 (2). In 2014, a total of 586 heart transplants in children (aged < 18 years) were performed worldwide (3). They comprise 12% of all cardiac transplants reported to the Registry of the International Society for Heart and Lung Transplantation (4). Median survival of children after heart transplantation has increased to about 20 years (5,6), with the lowest 3-year survival rate in children in Europe under the age of 1 (84.0) and the highest in children between the ages 6 to 10 (89.1)(7,8). Accordingly, an increasing amount of research focuses on long-term outcomes and quality of life (QoL) after PHTX. Although it is life-saving, it is not curative and children are confronted with chronic health problems (9). Research generally suggests that chronic and/or serious disease in childhood is associated with an increased risk for non-normative physical, psychological and social development (10-12). Serious disease is negatively associated with QoL and identity development of children and adolescents and puts young adults at risk for reduced occupational and social success (13-16). When it comes to PHTX, research shows that it is associated with large improvements in functional status (17). At the same time, a substantial proportion of children and adolescents after PHTX report psychological problems, such as depression, anxiety and behavioral problems (18-22). These psychological problems potentially negatively impact QoL, alongside socio-demographic and medical factors such as renal diseases (23) and infections (24). Later in life, the majority of patients achieve important academic and professional milestones and social well-being (25). A study on adult patients after PHTX reports good QoL and good academic and professional achievement, while patients were most satisfied in the family domain and least satisfied in the psychological and spiritual domain. Most respondents had graduated from high school, reported an average annual income and lived independently (26). Another study focused on the population of young adults (aged 18-25) comparing PHTX patients with two other patient groups (patients with congenital heart disease of moderate severity and patients with congenital heart disease of complex severity). Results showed no differences between the groups in terms of psychosocial maturity, parental fostering of autonomy and transition readiness. Higher psychosocial maturity and parental fostering of autonomy were associated with better perceived mental health and QoL (27). While this study has contributed important insights into psychosocial development of young adults after PHTX, more research into the unique developmental tasks of PHTX patients during emerging adulthood is needed in order to discern a multitude of factors that are potentially relevant to their subjective well-being and QoL.



Emerging adulthood describes a developmental phase of individuals in industrialized countries lasting from the late teens to late twenties, with specific developmental tasks: a) detachment from the family with spatial (home stay), financial (support from parents) and emotional independence (autonomy experience); b) apprenticeship, training and entering career with the topics of leaving school and finding a job (professional identity); and c), entering romantic relationships (partner selection, building an intimate relationship with a partner) (28-31). In addition, the social environment, especially the peer group, is crucial for well-being and closely linked to the self-reported QoL in this age group (32). In the present study, these developmental tasks in young adults after PHTX were investigated by using well-established questionnaires and by re-grouping subscales and items into developmental domains for exploratory analysis listed in table 1. Furthermore, we looked at subjective physical well-being (specifically, the concept subjective physical complaints comprising the subscales fatigue tendency, gastric complaints, limb pain and heart complaints, as well as the concept physical well-being) and at psychological well-being. Finally, we assessed physical QoL (by means of the SF-36 subscales physical functioning, general health, vitality, physical role, pain and the physical summary scale) and psychological QoL (by means of the SF-36 subscales vitality, social functioning, emotional role, mental health and the mental summary scale), in order to gain an impression of the current subjective health status of the sample.

Table 1. Overview of the instruments we used, clarifying domains and concepts

| DOMAIN                          | CONCEPT                       | INSTRUMENT                | (SUB)SCALE/ ITEM                    |
|---------------------------------|-------------------------------|---------------------------|-------------------------------------|
| <b>FAMILY</b>                   |                               |                           |                                     |
|                                 | Current living situation      | Demographic questionnaire | Living Situation (Item)             |
|                                 | Spatial independence          | Demographic questionnaire | Distance from Parents (Item)        |
|                                 | Relationship with the parents | Kidscreen-27              | Autonomy & Parent Relation Subscale |
| <b>EDUCATION AND PROFESSION</b> |                               |                           |                                     |
|                                 | Educational level             | Demographic questionnaire | Highest Completed Education (Item)  |
|                                 | Repeated school years         | Demographic               | Number of Repeated School           |

|  |                                       |                           |                                           |
|--|---------------------------------------|---------------------------|-------------------------------------------|
|  |                                       | questionnaire             | Years (Item)                              |
|  | Employment situation                  | Demographic questionnaire | Current Employment Situation (Item)       |
|  | Financial situation                   | Demographic questionnaire | Maintaining Livelihood (Item)             |
|  | <b>PARTNERSHIP</b>                    |                           |                                           |
|  | Marital status                        | Demographic questionnaire | Marital Status (Item)                     |
|  | Partner status                        | Demographic questionnaire | Partner Status (Item)                     |
|  | Duration of longest relationship      | Demographic questionnaire | Duration of Longest Relationship (Item)   |
|  | <b>SOCIAL ENVIRONMENT</b>             |                           |                                           |
|  | Social support in general             | F-SozU                    | F-SozU Total Score                        |
|  | Social support by peers               | Kidscreen-27              | Subscale Perceived Social Support & Peers |
|  | Feelings about school                 | Kidscreen-27              | Subscale School                           |
|  | Social functioning                    | SF-36                     | Subscale Self-Rated Social Function       |
|  | Re-integration after PHTX             | Demographic questionnaire | Re-Integration at School (Item)           |
|  | <b>SUBJECTIVE PHYSICAL WELL-BEING</b> |                           |                                           |
|  | Subjective physical complaints        | GBB                       | Total Score                               |
|  | Fatigue Tendency                      | GBB                       | Subscale Fatigue Tendency                 |
|  | Gastric Complaints                    | GBB                       | Subscale Gastric Complaints               |
|  | Limb Pain                             | GBB                       | Subscale Limb Pain                        |
|  | Heart Complaints                      | GBB                       | Subscale Heart Complaints                 |
|  | Physical well-being                   | Kidscreen-27              | Subscale Physical Well-Being              |
|  | <b>SUBJECTIVE</b>                     |                           |                                           |

|                                 |                                          |              |                                   |
|---------------------------------|------------------------------------------|--------------|-----------------------------------|
| <b>PSYCHOLOGICAL WELL-BEING</b> |                                          |              |                                   |
|                                 | Psychological well-being                 | Kidscreen-27 | Subscale Psychological Well-Being |
| <b>QOL</b>                      |                                          |              |                                   |
|                                 | Physical functioning                     | SF-36        | Subscale Physical Functioning     |
|                                 | General health                           | SF-36        | Subscale General Health           |
|                                 | Physical limits in everyday functioning  | SF-36        | Subscale Physical Role            |
|                                 | Pain                                     | SF-36        | Subscale Bodily Pain              |
|                                 | <b>Physical quality of life</b>          | SF-36        | Physical Summary Scale            |
|                                 | Vitality                                 | SF-36        | Subscale Vitality                 |
|                                 | Social functioning                       | SF-36        | Subscale Social Functioning       |
|                                 | Emotional limits in everyday functioning | SF-36        | Subscale Emotional Role           |
|                                 | Mental health                            | SF-36        | Subscale Mental Health            |
|                                 | <b>Psychological quality of life</b>     | SF-36        | Mental Summary Scale              |

## Methods

### *Participants*

#### *Group of PHTX patients*

A total of 169 children and adolescents underwent a PHTX at our hospital from 1986 to 2010, of which 101 survived. In this cross-sectional study, young adults between the ages of 16 and 35 years who underwent heart transplantation when they were children (< 18 years) at a specialized heart center were eligible for participation. Patients were recruited during the routine medical checks in the hospital. Participation was voluntary. The study was approved by the Medical Ethics Committee Charité Mitte (Nr.EA2/002/10). Fifty-two eligible patients met the inclusion criteria, of whom 38 agreed to participate in the study.

If interested in participation, they received an information letter from the research team about the objectives, design and procedure of the study. Informed consent was obtained from all participants via

1  
2  
3 mail. After that, participants received questionnaires on paper, a stamped envelope and a letter with  
4 instructions on how to fill out and return the questionnaires via mail. Patients were instructed to fill out  
5 the questionnaires at home and to return the completed questionnaires using the stamped envelope.  
6  
7

8  
9  
10 Inclusion criteria for PHTX patients:

- 11 - PHTX at our hospital from 1986 to 2010
  - 12 - Current age between 16 and 35 years
- 13  
14  
15

### 16 *Group of healthy controls*

17  
18 A comparison group of 46 young healthy controls between the ages of 19 and 26 years with no known  
19 chronic diseases was recruited via social networks and personal contacts. We ensured that the control  
20 group had the same mean age and gender distribution as the PHTX group. Eligible participants were  
21 recruited via social network and personal contacts and, if interested in participation, were contacted by  
22 phone, e-mail or personally. Informed consent of each participant was obtained; participants then  
23 received the questionnaires via e-mail, mail (together with a stamped envelope), or in person.  
24  
25 Questionnaires were returned via mail or in person.  
26  
27

28  
29 Outcomes had been determined for all patients who previously asked for results by the end of the data  
30 collection (December 2016). Due to the exploratory design, the development of the research question  
31 was not informed by patients' priorities, experience, and preferences.  
32  
33  
34  
35

36 Inclusion criteria for healthy controls:

- 37 - Young adults between the ages of 16 and 35 years
  - 38 - No known chronic disease
- 39  
40  
41

### 42 *Patients and public involvement*

43  
44 The study was designed to understand patients' experience and to observe developmental tasks of  
45 young adults after pediatric heart transplantation. However, patients were not included in the design of  
46 the survey, recruitment or conduct of the study. Patients were informed about the option to be  
47 debriefed about the study results after completion of the study.  
48  
49

### 50 *Instruments*

#### 51 *Demographics*

52  
53 Demographic information was obtained via a questionnaire developed by the research team with the  
54 following items: marital status, partner status, duration of longest relationship, living situation, distance  
55  
56  
57

1  
2  
3 from parents' home, educational level, number of repeated school years, current employment situation,  
4 maintaining livelihood, successful re-integration at school after PHTX. For an overview of items used for  
5 the analysis of each developmental domain, see table 1. Additionally, the variables age, sex and date of  
6 transplantation were obtained from medical records.  
7  
8  
9

### 10 *Social Support Questionnaire- Short Form*

11 The German version of the Social Support Questionnaire-Short Form (Fragebogen zur Sozialen  
12 Unterstützung; F-SozU, K-14) was used, which is a 14-item self-report of subjectively perceived or  
13 anticipated social support. A total score can be computed, which ranges from 1 to 5 and which was used  
14 for the analysis of the domain 'social environment'; see table 1. Psychometric properties are good (33).  
15  
16  
17  
18  
19  
20

### 21 *Giessen Complaints Inventory*

22 The German version of the Giessen Complaints Inventory (Gießener Beschwerde-Bogen, GBB) by Brähler  
23 and Scheer (1995) was used . The GBB is an instrument for physical complaints frequently used in  
24 Germany which measures subjective limitations experienced by patients due to their physical symptoms.  
25 The questionnaire comprises 24 items and contains the following subscales: fatigue tendency, gastric  
26 complaints, limb pain and heart complaints. Scores per subscale range from 0 to 24. A total score  
27 (general discomfort) can be computed, which ranges from 0 to 96 points. The total score was used for  
28 the analysis of the domain 'subjective physical well-being'. Psychometric properties are good.  
29  
30  
31  
32  
33  
34  
35

### 36 *Kidscreen-27*

37 The KIDSCREEN-27 by Ravens-Sieberer et al. (2005) is a German questionnaire for health-related QoL  
38 specifically developed for children. It measures the following five subscales: 'autonomy and parent  
39 relations', which we used in the domain 'family', 'perceived social support & peers' and 'school', both of  
40 which we used in the domain 'social environment'; 'physical well-being' and 'psychological well-being',  
41 which we used in the domains 'subjective physical well-being' and 'subjective psychological well-being'  
42 (see table 1). Scores per subscale range from 0 to 100, with a higher score indicating a better QoL. A total  
43 score can be computed ranging from 0 to 100 points. Psychometric properties are good (34).  
44  
45  
46  
47  
48  
49  
50

### 51 *Short-Form -36-Item Health Survey*

52 The German Version of the Short-Form-36 (SF-36) by Bullinger and Kirchberger (1998) was used, which is  
53 a generic health survey comprising 36 items in eight subscales (physical functioning, role functioning  
54 physical, bodily pain, general health perceptions, vitality, social functioning, role functioning emotional  
55  
56  
57  
58

1  
2  
3 and mental health). We subsumed each of the subscales into the domains 'subjective physical well-  
4 being' and 'subjective psychological well-being', as appropriate (see table 1). The subscales can be  
5 aggregated into two component summary scores representing the physical summary scale and the  
6 mental summary scale, both of which we used in the domain 'quality of life' (see table 1). Subscale and  
7 summary scores range from 0 to 100, based on transformed z-scores with multiplication of the  
8 regression coefficients of the normative sample. A higher score indicates a better QoL. Psychometric  
9 properties are good (35).

## 16 Analysis

17 IBM SPSS Statistics 23 was used for descriptive and inferential statistics. A p-value of  $\leq 0.05$  was  
18 considered statistically significant. Chi-square tests for dichotomous variables univariate analyses of  
19 variance were performed for exploratory group comparisons in all developmental domains (for an  
20 overview of developmental domains, see table 1). Univariate regressions were conducted for exploratory  
21 analyses of predictors of physical and psychological QoL.

## 27 Results

### 29 *Sample characteristics*

31 All 38 participants of the PHTX group underwent heart transplantation when they were children, with a  
32 mean age at time of transplantation of 10.95 years ( $SD=3.7$ ). The mean age at time of recruitment was  
33 22.11 years ( $SD=4.7$ ), ranging from 16 to 35 years. Fifty percent of the patients were male. The mean  
34 waiting time for an organ was 0.47 years ( $SD=0.5$ ). Number of years between PHTX and assessment was  
35 on average 11.16 years ( $SD=5.3$ ), ranging from 4 to 23 years.

36 In the control group, mean age at assessment was 22.91 years ( $SD=1.8$ ), ranging from 19 to 26 years; 45  
37 percent were male.

38 Between groups, there are no significant differences in age ( $F(1,45,67) = 1.00, p = 0.285$ ) or gender ( $\chi^2(1,$   
39  $N=84) = 1.98, p=0.159$ ). Regarding the educational level, the control group was significantly more highly  
40 educated than the PHTX patients ( $F(1,79) = 130.39, p < 0.001$ , high school or university in 96% and 8%,  
41 respectively). Furthermore, the control group individuals reported being in a partnership more often  
42 than the PHTX patients ( $\chi^2(1, N=84) = 9.42, p = 0.002$ , 65% and 32%, respectively).

### 52 Family

53 In this domain, we focused on the current living situation, spatial independence and relationship with  
54 the parents, with the following results: The living situation differs significantly between the PHTX and  
55 control group,  $F(1,82) = 4.10, p = 0.046$ . Twenty-one of the PHTX patients (55%) lived with their parents,  
56  
57  
58

while the remaining 45% had moved out. Of those 45%, 18% lived with their partner, 11% lived alone, 11% lived next to their parents in a separate apartment and 5% shared a flat. By contrast, only 22% of the control group lived with their parents, while 78% had moved out, see table 2.

In the subgroup of participants who no longer live with their parents, the distance to the parents' home in km differs significantly between the groups ( $F(1,26.0) = 45.57, p < 0.001$ ). The PHTX stay closer to their parents' house ( $M=1.66\text{km}, SD=1.26\text{km}$ ), while the healthy controls move further away ( $M=213.37\text{km}, SD=280.99\text{km}$ ).

The perceived quality of the relationship with their parents and self-estimated autonomy are reported differently in the two groups ( $F(1,57) = 5.72, p = 0.02$ ), with higher scores reported by the PHTX group than by the control group, indicating higher perceived quality of the relationship and perceived autonomy in the PHTX group, see table 2.

Table 2. Characteristics and metrics of family variables in the PHTX group and control group

| Characteristic                   | assessed by                      | Value           | PHTX (N=38) | Control group (N=46) | p       |
|----------------------------------|----------------------------------|-----------------|-------------|----------------------|---------|
| Living situation                 | Social demographic questionnaire | With parents    | 21 (55%)    | 10 (22%)             | 0.046   |
|                                  |                                  | With partner    | 7 (18%)     | 9 (20%)              |         |
|                                  |                                  | Alone           | 4 (11%)     | 10 (21%)             |         |
|                                  |                                  | Next to parents | 4 (11%)     | 0                    |         |
|                                  |                                  | Flat share      | 2 (5%)      | 17 (37%)             |         |
| Distance to parents' home in km  | Social demographic questionnaire | Mean            | 1.66        | 213.37               | < 0.001 |
|                                  |                                  | SD              | 1.26        | 280.99               |         |
| Relation to parents and autonomy | KIDSCREEN-27                     | Mean            | 59.15       | 53.49                | 0.020   |
|                                  |                                  | SD              | 9.27        | 7.78                 |         |

### Education and profession

In this domain, we focused on the number of repeated school years, the educational level, employment situation and financial situation. The educational level differs significantly between the two groups ( $F(1,79) = 130.4, p < 0.001$ ): the PHTX patients less often completed high school education than healthy controls (52% and 96%, respectively), fewer of them were currently studying (3% and 62%, respectively) and a smaller percentage achieved an academic degree (5% and 33%, respectively). Three PHTX patients (8%) had dropped out of school, as opposed to no participants from the healthy control group. At school, the PHTX group had to repeat a grade significantly more often than the control group ( $\chi^2(1, N=80) = 20.53, p < 0.001$ ). Ten PHTX patients (26%) repeated one school year and three PHTX patients (8%) repeated two school years, while none of the control group repeated a school year.

The type of the current job also differs between the two groups ( $\chi^2 (1, N=79) = 26.36, p < 0.001$ ), with PHTX patients having part-time jobs less often than the control group (9% and 34%, respectively). The PHTX group's occupations are distributed between jobs in full time (23%), training (11%), apprenticeship (17%), unemployed (23%), retired (11%), half time jobs (3%) or part time jobs (6%) and other (6%). The control group reported the following occupations: full time (5%), training (2%), apprenticeship (40%), unemployed (5%), half time jobs (2%), part time jobs (32%) and other (14%). Finally, sources of financial support differ between the groups ( $F(1,78) = 13.44, p < 0.001$ ): sources of income are more widely distributed in PHTX patients, in comparison with the control group (see table 3). Thirty-four percent of the PHTX group reported being financially independent because of a paid job, as opposed to 64% of the control group. Furthermore, PHTX patients less often receive financial support from their parents than the control group ( $\chi^2 (1, N=80) = 11.75, p = 0.001$ ).

Table 3.

Characteristics and metrics of school, apprenticeship and financial variables in PHTX and control group

| characteristics                    | Value                                          | PHTX (N=38) | control group (N=46) | p       |
|------------------------------------|------------------------------------------------|-------------|----------------------|---------|
| Repeated years at school           | Yes                                            | 14 (37%)    | 0                    | < 0.001 |
|                                    | No                                             | 21 (55%)    | 46                   |         |
| Number of repeated years at school | 0                                              | 20 (53%)    | 46                   | < 0.001 |
|                                    | 1                                              | 10 (26%)    | 0                    |         |
|                                    | 2                                              | 3 (8%)      | 0                    |         |
| Education level                    | Still attending school                         | 4 (10%)     | 0                    | < 0.001 |
|                                    | No exam                                        | 3 (8%)      | 0                    |         |
|                                    | School for children with learning difficulties | 5 (13%)     | 0                    |         |
|                                    | Secondary school level                         | 22 (58%)    | 1 (2%)               |         |
|                                    | A-level                                        | 1 (3%)      | 27 (59%)             |         |
|                                    | College                                        | 1 (3%)      | 0                    |         |
|                                    | University                                     | 1 (3%)      | 15 (33%)             |         |
| Current job                        | Full time                                      | 8 (21%)     | 2 (4%)               | < 0.001 |
|                                    | Half time                                      | 1 (3%)      | 1 (2%)               |         |
|                                    | Part time                                      | 2 (5%)      | 14 (30%)             |         |
|                                    | Training                                       | 4 (11%)     | 1 (2%)               |         |
|                                    | Apprenticeship                                 | 6 (16%)     | 18 (39%)             |         |
|                                    | Unemployed                                     | 8 (21%)     | 2 (4%)               |         |
|                                    | Retired                                        | 4 (11%)     | 0                    |         |
|                                    | Other                                          | 2 (5%)      | 6 (13%)              |         |
| Financial life (multiple choice)   | Own money via job                              | 13 (34%)    | 30 (65%)             | <0.001  |
|                                    | Parents/family members                         | 15 (39%)    | 37 (80%)             |         |
|                                    | Dole                                           | 5 (13%)     | 0                    |         |
|                                    | Pension                                        | 8 (21%)     | 0                    |         |
|                                    | Welfare                                        | 4 (11%)     | 0                    |         |



|        |         |         |
|--------|---------|---------|
| Others | 4 (11%) | 8 (17%) |
|--------|---------|---------|

### Partnership

In this domain, we focused on marital status, partner status and the duration of the longest relationship. The marital status differs significantly between the two groups ( $\chi^2 (1, N=84) = 14.34, p = 0.002$ ): 92% of the PHTX patients reported being single, 5% were married and 3% divorced. In comparison, 100% of the control group was single and none were married or divorced. In the subgroup of single participants, 65% of the PHTX patients and 32% of the control group reported having a partner ( $\chi^2 (1, N=84) = 9.42, p = 0.002$ ). The duration of the longest relationship does not differ between groups ( $F(1,75) = 1.52, p = 0.222$ ); see table 4 for an overview.

Table 4.

Characteristics and metrics of partnership in PHTX and control group

| Characteristics                              | PHTX (N=38) | control group (N=46) | p     |
|----------------------------------------------|-------------|----------------------|-------|
| Marital status                               |             |                      | 0.002 |
| Single                                       | 35 (92%)    | 46 (100%)            |       |
| Divorced                                     | 1 (3%)      | 0                    |       |
| Married                                      | 2 (5%)      | 0                    |       |
| Having a partner                             |             |                      | 0.002 |
| Yes                                          | 12 (32%)    | 30 (65%)             |       |
| No                                           | 26 (68%)    | 16 (35%)             |       |
| Duration of longest relationship (in months) |             |                      | 0.222 |
| Mean                                         | 23.45       | 31.67                |       |
| SD                                           | 25.81       | 29.36                |       |

### Social environment

In this domain, we focused on social support in general, social support by peers, feelings about school, re-integration after PHTX, as well as the self-rated social function, with the following results. The PHTX group was asked if re-integration at school after HTX was 'successful or not' (dichotomous variable) as part of the demographic questionnaire. Fifty-eight percent reported the reentry into school as not successful. The total score of the F-SozU differs between the groups ( $F(1,44.92) = 23.39, p < 0.001$ ), with the control group reporting higher perceived social support than the PHTX group. On the KIDSCREEN-27 subscale 'social support by peers', the PHTX group scored lower than the control group ( $F(1,75) = 1.52, p$

= 0.22), indicating less perceived support by their peer group. On the SF-36 subscale 'social functioning', the PHTX group also scored lower than healthy controls ( $F(1,82) = 6.11, p = 0.015$ ), indicating poorer social functioning, see table 5.

Table 5.  
Social support of PHTX patients and control group

| Characteristics         | Assessed by                      | Value          | PHTX (N=46) | control group (N=38) | P       |
|-------------------------|----------------------------------|----------------|-------------|----------------------|---------|
| Integration in school   | Social demographic questionnaire | Successful     | 16 (42%)    |                      |         |
|                         |                                  | Not successful | 22 (58%)    |                      |         |
| Social support          | F-SozU                           | Mean           | 4.31        | 4.77                 | < 0.001 |
|                         |                                  | SD             | 0.65        | 0.28                 |         |
| Social support by peers | KIDSCREEN-27                     | Mean           | 45.5        | 50.38                | 0.046   |
|                         |                                  | SD             | 10.98       | 7.39                 |         |
| Feelings about school   | KIDSCREEN-27                     | Mean           | 50.90       | 51.19                | 0.901   |
|                         |                                  | SD             | 9.47        | 6.37                 |         |
| Social functioning      | SF-36                            | Mean           | 80.59       | 91.03                | 0.022   |
|                         |                                  | SD             | 24.26       | 13.86                |         |

### Subjective well-being and quality of life

In this domain we focused on different aspects of subjective physical well-being (subjective physical complaints, physical functioning, general health, physical limits in everyday functioning, pain and physical well-being), psychological well-being (psychological well-being, vitality, social functioning and emotional limits in everyday functioning) as well as the physical and psychological QoL.

**Subjective physical well-being.** Subjective physical complaints, as assessed with the GBB total score, do not differ between the two groups ( $F(1,83) = 0.78, p = 0.379$ ). On a subscale level, a significant difference was found on the subscale fatigue tendency ( $F(1,83) = 4.39, p = 0.039$ ), with PHTX patients reporting more fatigue symptoms than the control group ( $M=3.0, SD=2.79$  and  $M=1.91, SD=1.95$ , respectively). No differences were found on the subscales of gastric complaints, limb pain or heart complaints. On the subscale physical well-being of the Kidscreen-27, no significant difference was observed between groups ( $F(1,60) = 3.67, p = 0.06$ ).

**Subjective psychological well-being.** No significant difference on the Kidscreen-27 subscale 'psychological well-being' was observed between groups ( $F(1,60) = 3.93, p = 0.052$ ).

1  
2  
3 **QoL.** The PHTX patients reported a lower level of physical QoL based on the physical summary scale of  
4 the SF-36 than the control group ( $F(1,43.54) = 14.51, p < 0.001$ ). Also, the PHTX patients scored lower in  
5 all physical subscales than the control group (physical functioning:  $F(1,82)=21.69, p<0.001$ ; role physical:  
6  $F(1,78)=7.92, p=0.006$ ; bodily pain:  $F(1,82)=6.04, p=0.016$ ; general health:  $F(1,78)=4.9, p=0.03$ ) (see figure  
7 1).

8  
9  
10  
11  
12  
13 However, the PHTX patients showed no differences in psychological QoL, based on the mental summary  
14 scale of the SF-36 ( $F(1,76) = 0.15, p = 0.70$ ). On the subscale-level, only 'social functioning' differed  
15 between the groups ( $F(1,82) = 6.11, p = 0.015$ ), with a lower score reported by the PHTX patients (see  
16 figure 2).

### 17 **Predictors of physical and mental quality of life in PHTX patients**

18  
19  
20  
21 To explore which factors predict QoL (psychological and physical) in PHTX patients, we correlated all  
22 variables (from the domains family, education and profession, partnership, social environment and  
23 subjective well-being) with the physical and psychological component summary scores of the SF-36 as a  
24 first step. Based on significant exploratory correlations, variables were then selected as predictors for  
25 each of the two scales. Regression assumptions were checked and met for both regressions. Next, we  
26 calculated two stepwise univariate regression models (one for each summary scale of the SF-36).  
27 Variables were included stepwise as independent variables in the regression model. In order to avoid  
28 overfitting the model, all SF-36 subscales comprising the physical QoL component were excluded from  
29 the regression analysis, with the physical summary scale as criterion. All SF-36 subscales comprising  
30 psychological QoL were excluded from the analysis, with the mental summary scale as criterion.

#### 31 **Predictors of physical quality of life**

32  
33  
34 The following predictors were entered in the first regression model, with physical QoL entered as  
35 criterion: 1) school re-integration ( $r=0.497, p=0.01$ ); 2) physical complaints ( $r=-0.381, p=0.035$ ); 3) vitality  
36 ( $r= 0.369, p=0.041$ ); 4) social support by peers ( $r=0.771, p<0.001$ ); and 5) subjective physical and  
37 psychological well-being ( $r=0.595, p=0.012$ ; respectively  $r =0.520, p=0.033$ ,). The analyses revealed that  
38 better social support by peers (comprising, for instance, the items 'have you spent time with your  
39 friends?' or 'have you and your friends helped each other') predicts a higher physical QoL in PHTX  
40 patients, explaining 58.9% of variance ( $p=0.001$ ). See table 6 for the full regression model.

#### 41 **Predictors of psychological QoL**

42  
43  
44 The following predictors were entered in the second regression model, with psychological QoL as  
45 criterion: 1) duration of longest relationship ( $r=-0.455, p=0.022$ ); 2) distance from parents' home ( $r=-$

0.443,  $p=0.013$ ); physical complaints ( $r=-0.491$ ,  $p=0.005$ ); 3) role physical ( $r=0.498$ ,  $p=0.005$ ) and 4) subjective psychological well-being ( $r=0.683$ ,  $p=0.003$ ). The analysis revealed two significant predictors: fewer physical complaints and a better role functioning predicted better psychological QoL in PHTX patients, explaining 89.0% of variance ( $p<0.001$ ). See table 6 for the best fitting model.

Table 6.  
Stepwise linear univariate regression model: predictors of QoL (n=38)

| Criterion    | Predictor                               | <i>B</i> | SE   | <i>p</i> | 95% C.I. for B |       |
|--------------|-----------------------------------------|----------|------|----------|----------------|-------|
|              |                                         |          |      |          | Lower          | Upper |
| Physical QoL | Peers (KIDSCREEN-27)                    | 0.77     | 0.15 | 0.001*   | 0.34           | 0.96  |
|              | Constant                                |          | 6.95 | 0.01*    | 5.81           | 35.64 |
| Mental QoL   | Physical Complaints (GGB)               | 0.40     | 0.09 | 0.005*   | -0.45          | -0.53 |
|              | Role Physical (physical subscale SF-36) | 0.68     | 0.07 | <0.0001* | 0.15           | 0.45  |
|              | Constant                                |          | 6.5  | 0.008*   | 5.53           | 32.55 |

## Discussion

In this study, we explored developmental tasks of emerging adulthood in a sample of young adults after PHTX in an exploratory manner. The following categories were examined: a) family (current living situation, spatial independence, relationship with the parents) b) education and profession (educational level, repeated school years, employment situation, financial situation) c) partnership (marital status, partner status and duration of longest relationship) and d) social environment (perceived social support in general, by peers, feelings about school, social functioning, and re-integration at school after PHTX). Additionally, subjective physical well-being, subjective psychological well-being and QoL (physical and psychological) were assessed. Finally, we investigated which of the variables from domains a-d, as well as variables from the domains subjective physical and psychological well-being predict self-reported QoL.

In comparison to our control group, PHTX patients more often live with their parents and when they move out, they stay in closer proximity to their parents. We found no differences in the perceived quality of the relationship with the parents.

When it comes to financial independence, the PHTX patients rely less on their family for financial support than the control group. PHTX patients held full-time positions more frequently than the control group, while healthy controls more often chose part time work. Importantly, a significant percentage of PHTX patients had no job and/or received a pension. These findings are similar to those of a recent study by Grady and colleagues, who examined 88 young adults after pediatric heart transplantation in their early

1  
2  
3 twenties (36). About 50% of the patients reported working for income, compared to 51% in our study  
4 (part time work, full time work and apprenticeship taken together). As in our study, PHTX patients more  
5 frequently had to repeat at least one school year, probably due to health problems and hospital stays,  
6 the choice of full-time work, which might reflect the choice for non-academic career paths, might be  
7 related to more academic difficulties related to their disease. Future studies should focus on this issue,  
8 systematically investigating academic disadvantages and choices due to underlying disease and the  
9 challenges that come with PHTX.  
10

11  
12  
13  
14  
15 When it comes to partnership, more PHTX patients reported being single than healthy individuals from  
16 the control group, even though the groups did not differ in age. However, the duration of the longest  
17 relationship did not differ between groups. The results differ somewhat from those of the study by  
18 Grady and colleagues (36), in which only 9% of the patients reported having a partner, compared to the  
19 32% in our study. This finding might be due to difficulties in initiating partnership, while partnership  
20 stability might not be compromised in PHTX patients once they have found a partner. Furthermore, PHTX  
21 patients in our sample reported less perceived social support in general and by their peers. Social  
22 contacts are of great importance for teenagers and young adults. Facilitating social relationships in order  
23 to increase well-being and QoL of this vulnerable group might be an important goal for psychosocial  
24 reintegration in patients after PHTX. Future studies should take a closer look at social relationships in this  
25 group, focusing on number of social relationships, as well as quality and stability of their social networks.  
26 PHTX patients reported a higher fatigue tendency than the control group, while no differences were  
27 found in other areas of physical complaints. Symptoms of fatigue might limit PHTX patients' activities in  
28 daily life and hinder participation in social life, leisure activities etc. This finding also warrants further  
29 investigation.  
30

31  
32  
33 PHTX patients reported equal psychological well-being to the control group, which is a favorable result.  
34 However, they did report lower a physical QoL. In our exploratory regression models, we found that  
35 better perceived social support by peers predicts a better physical QoL, with a high proportion of  
36 explained variance. While these results further emphasize the importance of peer relations in this age  
37 group, the relationship between physical well-being and peer relations should be investigated further.  
38 Finally, we found that fewer physical complaints predict a better mental QoL, also with a large  
39 proportion of explained variance. In sum, PHTX patients fare well when it comes to their financial  
40 autonomy, relationship with their parents and profession, while they only rarely choose an academic  
41 career. They report lower social support in general and from peers and have more physical complaints  
42 (fatigue tendency), as well as reduced physical QoL, which both seem to be intertwined with social  
43 support from peers. While, on average, their mental well-being is comparable to that of the control  
44  
45  
46  
47  
48  
49  
50  
51  
52  
53  
54  
55  
56  
57  
58  
59  
60

1  
2  
3 group, fewer physical complaints predict higher scores on the mental well-being scale, also pointing to  
4 the key role of their physical health for other domains of functioning.  
5  
6  
7

#### 8 Limitations

9  
10 Importantly, this study is cross-sectional, exploratory and comprised a small sample of PHTX patients.  
11 Accordingly, the results should be cautiously interpreted. Future studies investigating developmental  
12 challenges of PHTX patients during emerging adulthood should be longitudinal, in order to shed light on  
13 psychosocial adjustment after PHTX across time. Control groups should be carefully matched according  
14 to key variables. No correction for multiple testing was applied, as this study is exploratory and  
15 hypothesis-generating. Our results need to be interpreted accordingly and replicated in a confirmatory  
16 manner.  
17  
18  
19  
20

#### 21 Acknowledgment

22  
23 The authors thank all participants for being a part of this study. The authors thank Anne Gale for editorial  
24 assistance, Hannah Tame for native speaker correction, Julia Stein and the Institute for Biometry and  
25 Clinical Epidemiology of the Charité Berlin for statistical advice, and the ethics committee and the data  
26 protection registrar of the Charité Berlin for ethical and data protection advices.  
27  
28  
29  
30

#### 31 Conflict of interests

32  
33 None  
34  
35

#### 36 Authors' contribution

37  
38 Maria Sepke and Wolfgang Albert made substantial contributions to the conception and design of the  
39 work. Maria Sepke and Hannah Ferentzi contributed to manuscript drafting and editing. Maria Sepke,  
40 Hannah Ferentzi, Vera Disselhoff and Wolfgang Albert reviewed the manuscript and made amendments.  
41 All authors critically reviewed and approved the final version. All authors agree to be accountable for all  
42 aspects of the work.  
43  
44  
45  
46  
47

#### 48 Data statement section

49  
50 No additional data available.  
51  
52

#### 53 Funding

54  
55 This research received no specific grant from any funding agency in the public, commercial or not-for-  
56 profit sectors.  
57  
58

1  
2  
3  
4  
5 Figure legend

6 Figure 1. Means of z-transformed scores of the SF-36 physical summary scale and all physical subscales  
7 raw values 0–100 of PHTX and control group.

8  
9 Figure 2. Means of z-transformed scores of the SF-36 mental summary scale and all psychological  
10 subscales raw values 0–100 of PHTX and control group.  
11  
12  
13  
14  
15

16  
17 References

- 18 1. Kirklin J. Current challenges in pediatric heart transplantation for congenital heart disease.  
19 *Current Opinion in Organ Transplantation*. 2015;20(5):577-83.
- 20 2. Rossano JW, Cherikh WS, Chambers DC, Goldfarb S, Khush K, Kucheryavaya AY, et al. The Registry  
21 of the International Society for Heart and Lung Transplantation: Twentieth Pediatric Heart  
22 Transplantation Report-2017; Focus Theme: Allograft ischemic time. *J Heart Lung Transplant*. 2017  
23 Oct;36(10):1060-9.
- 24 3. Rossano JW, Dipchand AI, Edwards LB, Goldfarb S, Kucheryavaya AY, Levvey Rn BJ, et al. The  
25 Registry of the International Society for Heart and Lung Transplantation: Nineteenth Pediatric Heart  
26 Transplantation Report-2016; Focus Theme: Primary Diagnostic Indications for Transplant. *J Heart Lung  
27 Transplant*. 2016 Oct;35(10):1185-95.
- 28 4. ISHLT. 2017; Available from: [www.isHLT.org/registries/](http://www.isHLT.org/registries/).
- 29 5. Dipchand AI, Kirk R, Edwards LB, Kucheryavaya AY, Benden C, Christie JD, et al. The Registry of  
30 the International Society for Heart and Lung Transplantation: Sixteenth Official Pediatric Heart  
31 Transplantation Report--2013; focus theme: age. *J Heart Lung Transplant*. 2013 Oct;32(10):979-88.
- 32 6. Thrush PT, Hoffman TM. Pediatric heart transplantation-indications and outcomes in the current  
33 era. *J Thorac Dis*. 2014 Aug;6(8):1080-96.
- 34 7. Dipchand AI, Edwards LB, Kucheryavaya AY, Benden C, Dobbels F, Levvey BJ, et al. The registry of  
35 the International Society for Heart and Lung Transplantation: seventeenth official pediatric heart  
36 transplantation report--2014; focus theme: retransplantation. *J Heart Lung Transplant*. 2014  
37 Oct;33(10):985-95.
- 38 8. ISHLT. ISHLT Transplant Registry Quarterly Reports for Heart in Europe 2018; Available from:  
39 [http://www.isHLT.org/registries/quarterlyDataReportResults.asp?organ=HR&rptType=recip\\_p\\_surv&cont  
40 inent=3](http://www.isHLT.org/registries/quarterlyDataReportResults.asp?organ=HR&rptType=recip_p_surv&content=3).
- 41 9. Tonsho M, Michel S, Ahmed Z, Alessandrini A, Madsen JC. Heart transplantation: challenges  
42 facing the field. *Cold Spring Harb Perspect Med*. 2014 May 1;4(5).
- 43 10. Pinquart M, Shen Y. Behavior problems in children and adolescents with chronic physical illness:  
44 a meta-analysis. *J Pediatr Psychol*. 2011 Oct;36(9):1003-16.
- 45 11. Pinquart M, Shen Y. Anxiety in children and adolescents with chronic physical illnesses: a meta-  
46 analysis. *Acta Paediatr*. 2011 Aug;100(8):1069-76.
- 47 12. Pinquart M, Shen Y. Depressive symptoms in children and adolescents with chronic physical  
48 illness: an updated meta-analysis. *J Pediatr Psychol*. 2011 May;36(4):375-84.
- 49 13. Calsbeek H, Rijken M, Bekkers MJ, Kerssens JJ, Dekker J, van Berge Henegouwen GP. Social  
50 position of adolescents with chronic digestive disorders. *Eur J Gastroenterol Hepatol*. 2002  
51 May;14(5):543-9.

14. Lindsay S. Employment status and work characteristics among adolescents with disabilities. *Disabil Rehabil*. 2011;33(10):843-54.
15. Maslow GR, Haydon A, McRee AL, Ford CA, Halpern CT. Growing up with a chronic illness: social success, educational/vocational distress. *J Adolesc Health*. 2011 Aug;49(2):206-12.
16. Stam H, Hartman EE, Deurloo JA, Groothoff J, Grootenhuis MA. Young adult patients with a history of pediatric disease: impact on course of life and transition into adulthood. *J Adolesc Health*. 2006 Jul;39(1):4-13.
17. Peng DM, Zhang Y, Rosenthal DN, Palmon M, Chen S, Kaufman BD, et al. Impact of Heart Transplantation on the Functional Status of US Children With End-Stage Heart Failure. *Circulation*. 2017 Mar 7;135(10):939-50.
18. DeMaso DR, Twente AW, Spratt EG, O'Brien P. Impact of psychologic functioning, medical severity, and family functioning in pediatric heart transplantation. *J Heart Lung Transplant*. 1995 Nov-Dec;14(6 Pt 1):1102-8.
19. Uzark KC, Sauer SN, Lawrence KS, Miller J, Addonizio L, Crowley DC. The psychosocial impact of pediatric heart transplantation. *J Heart Lung Transplant*. 1992 Nov-Dec;11(6):1160-7.
20. Wray J, Radley-Smith R. Longitudinal assessment of psychological functioning in children after heart or heart-lung transplantation. *J Heart Lung Transplant*. 2006 Mar;25(3):345-52.
21. Kollner V, Einsle F, Schade I, Maulhardt T, Gulielmos V, Joraschky P. The influence of anxiety, depression and post traumatic stress disorder on quality of life after thoracic organ transplantation. *Z Psychosom Med Psychother*. 2003;49(3):262-74.
22. Wray J, Radley-Smith R. Beyond the first year after pediatric heart or heart-lung transplantation: Changes in cognitive function and behaviour. *Pediatr Transplant*. 2005 Apr;9(2):170-7.
23. Choudhry S, Dharnidharka VR, Castleberry CD, Goss CW, Simpson KE, Schechtman KB, et al. End-stage renal disease after pediatric heart transplantation: A 25-year national cohort study. *J Heart Lung Transplant*. 2017 Oct 2.
24. Rostad CA, Wehrheim K, Kirklin JK, Naftel D, Pruitt E, Hoffman TM, et al. Bacterial infections after pediatric heart transplantation: Epidemiology, risk factors and outcomes. *J Heart Lung Transplant*. 2017 Sep;36(9):996-1003.
25. Copeland H, Razzouk A, Beckham A, Chinnock R, Hasaniya N, Bailey L. Social framework of pediatric heart recipients who have survived more than 15 post-transplant years: A single-center experience. *Pediatr Transplant*. 2017 Mar;21(2).
26. Hollander SA, Chen S, Luikart H, Burge M, Hollander AM, Rosenthal DN, et al. Quality of life and metrics of achievement in long-term adult survivors of pediatric heart transplant. *Pediatr Transplant*. 2015 Feb;19(1):76-81.
27. Mackie AS, Rempel GR, Islam S, Rankin K, McCurdy C, Vonder Muhll I, et al. Psychosocial Maturity, Autonomy, and Transition Readiness among Young Adults with Congenital Heart Disease or a Heart Transplant. *Congenit Heart Dis*. 2016 Mar-Apr;11(2):136-43.
28. Arnett JJ. Emerging adulthood. A theory of development from the late teens through the twenties. *Am Psychol*. 2000 May;55(5):469-80.
29. Havighurst RJ, editor. *Developmental tasks and education*. Chicago: University of Chicago Press;1948.
30. Rauer AJ, Pettit GS, Lansford JE, Bates JE, Dodge KA. Romantic relationship patterns in young adulthood and their developmental antecedents. *Dev Psychol*. 2013 Nov;49(11):2159-71.
31. Taylor SJ, Barker LA, Heavey L, McHale S. The typical developmental trajectory of social and executive functions in late adolescence and early adulthood. *Dev Psychol*. 2013 Jul;49(7):1253-65.
32. White-Williams C, Grady KL, Naftel DC, Myers S, Wang E, Rybarczyk B. The relationship of socio-demographic factors and satisfaction with social support at five and 10 yr after heart transplantation. *Clin Transplant*. 2013 Mar-Apr;27(2):267-73.



- 1  
2  
3 33. Fydrich T, Sommer G, Brähler E. F-SozU - Social support questionnaire. Brähler E, Schumacher J,  
4 Strauß B, editors. Göttingen: Hogrefe; 2002.
- 5 34. Ravens-Sieberer U, Gosch A, Rajmil L, Erhart M, Bruil J, Duer W, et al. KIDSCREEN-52 quality-of-  
6 life measure for children and adolescents. Expert Rev Pharmacoecon Outcomes Res. 2005 Jun;5(3):353-  
7 64.
- 8 35. Bullinger M, Kirchberger I. SF-36. Fragebogen zum Gesundheitszustand. Handanweisung.  
9 Göttingen: Hogrefe; 1998.
- 10  
11  
12 36. Grady KL, Van't Hof K, Andrei AC, Shankel T, Chinnock R, Miyamoto S, et al. Pediatric Heart  
13 Transplantation: Transitioning to Adult Care (TRANSIT): Baseline Findings. Pediatr Cardiol 2018; 39:354-  
14 364.  
15  
16  
17  
18  
19  
20  
21  
22  
23  
24  
25  
26  
27  
28  
29  
30  
31  
32  
33  
34  
35  
36  
37  
38  
39  
40  
41  
42  
43  
44  
45  
46  
47  
48  
49  
50  
51  
52  
53  
54  
55  
56  
57  
58  
59  
60

1  
2  
3  
4  
5  
6  
7  
8  
9  
10  
11  
12  
13  
14  
15  
16  
17  
18  
19  
20  
21  
22  
23  
24  
25  
26  
27  
28  
29  
30  
31  
32  
33  
34  
35  
36  
37  
38  
39  
40  
41  
42  
43  
44  
45  
46  
47  
48  
49  
50  
51  
52  
53  
54  
55  
56  
57  
58  
59  
60

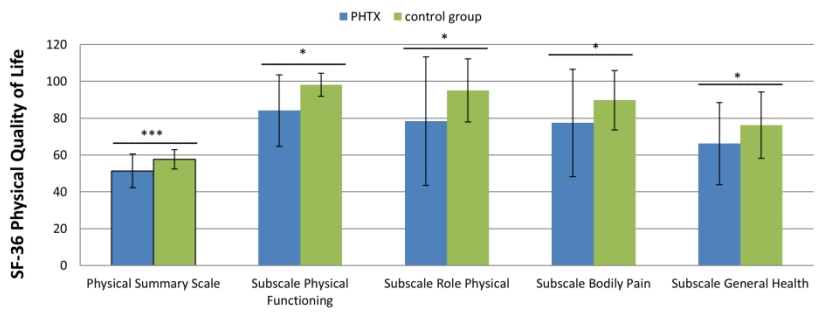

Figure 1. Means of z-transformed scores of the SF-36 physical summary scale and all physical subscales raw values 0–100 of PHTX and control group.

254x190mm (300 x 300 DPI)

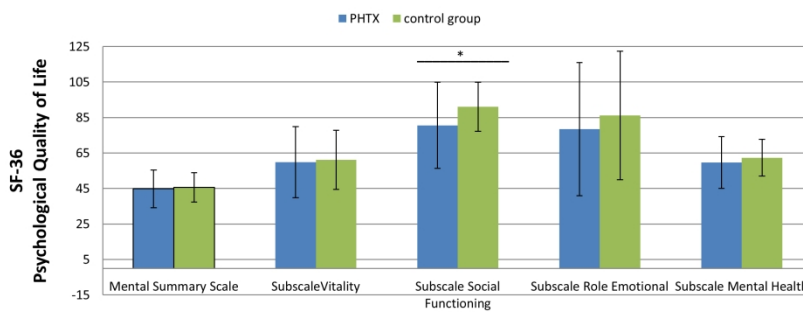

Figure 2. Means of z-transformed scores of the SF-36 mental summary scale and all psychological subscales raw values 0–100 of PHTX and control group.

254x190mm (300 x 300 DPI)

# Reporting checklist for case-control study.

Based on the STROBE case-control guidelines.

## Instructions to authors

Complete this checklist by entering the page numbers from your manuscript where readers will find each of the items listed below.

Your article may not currently address all the items on the checklist. Please modify your text to include the missing information. If you are certain that an item does not apply, please write "n/a" and provide a short explanation.

Upload your completed checklist as an extra file when you submit to a journal.

In your methods section, say that you used the STROBE case-control reporting guidelines, and cite them as:

von Elm E, Altman DG, Egger M, Pocock SJ, Gotsche PC, Vandembroucke JP. The Strengthening the Reporting of Observational Studies in Epidemiology (STROBE) Statement: guidelines for reporting observational studies.

|                        |     | Reporting Item                                                                                                                  | Page Number |
|------------------------|-----|---------------------------------------------------------------------------------------------------------------------------------|-------------|
| Title                  | #1a | Indicate the study's design with a commonly used term in the title or the abstract                                              | 1           |
| Abstract               | #1b | Provide in the abstract an informative and balanced summary of what was done and what was found                                 | 2           |
| Background / rationale | #2  | Explain the scientific background and rationale for the investigation being reported                                            | 4           |
| Objectives             | #3  | State specific objectives, including any prespecified hypotheses                                                                | 5           |
| Study design           | #4  | Present key elements of study design early in the paper                                                                         | 5           |
| Setting                | #5  | Describe the setting, locations, and relevant dates, including periods of recruitment, exposure, follow-up, and data collection | 5           |
| Eligibility criteria   | #6a | Give the eligibility criteria, and the sources and methods of case ascertainment and control selection. Give the rationale      | 5           |

|                            |      |                                                                                                                                                                                                                                                    |     |
|----------------------------|------|----------------------------------------------------------------------------------------------------------------------------------------------------------------------------------------------------------------------------------------------------|-----|
|                            |      | for the choice of cases and controls. For matched studies, give matching criteria and the number of controls per case                                                                                                                              |     |
|                            | #6b  | For matched studies, give matching criteria and the number of controls per case                                                                                                                                                                    | n/a |
|                            | #7   | Clearly define all outcomes, exposures, predictors, potential confounders, and effect modifiers. Give diagnostic criteria, if applicable                                                                                                           | 7   |
| Data sources / measurement | #8   | For each variable of interest give sources of data and details of methods of assessment (measurement). Describe comparability of assessment methods if there is more than one group. Give information separately for cases and controls.           | 6   |
| Bias                       | #9   | Describe any efforts to address potential sources of bias                                                                                                                                                                                          | n/a |
| Study size                 | #10  | Explain how the study size was arrived at                                                                                                                                                                                                          | 5   |
| Quantitative variables     | #11  | Explain how quantitative variables were handled in the analyses. If applicable, describe which groupings were chosen, and why                                                                                                                      | 6   |
| Statistical methods        | #12a | Describe all statistical methods, including those used to control for confounding                                                                                                                                                                  | 7   |
|                            | #12b | Describe any methods used to examine subgroups and interactions                                                                                                                                                                                    | 7   |
|                            | #12c | Explain how missing data were addressed                                                                                                                                                                                                            | 7   |
|                            | #12d | If applicable, explain how matching of cases and controls was addressed                                                                                                                                                                            | 7   |
|                            | #12e | Describe any sensitivity analyses                                                                                                                                                                                                                  | 7   |
| Participants               | #13a | Report numbers of individuals at each stage of study—eg numbers potentially eligible, examined for eligibility, confirmed eligible, included in the study, completing follow-up, and analysed. Give information separately for cases and controls. | 7   |
|                            | #13b | Give reasons for non-participation at each stage                                                                                                                                                                                                   | 7   |
|                            | #13c | Consider use of a flow diagram                                                                                                                                                                                                                     | n/a |
| Descriptive data           | #14a | Give characteristics of study participants (eg demographic,                                                                                                                                                                                        | 7   |

|    |                  |                                                                        |       |
|----|------------------|------------------------------------------------------------------------|-------|
| 1  |                  | clinical, social) and information on exposures and potential           |       |
| 2  |                  | confounders. Give information separately for cases and                 |       |
| 3  |                  | controls                                                               |       |
| 4  |                  |                                                                        |       |
| 5  |                  |                                                                        |       |
| 6  |                  | #14b Indicate number of participants with missing data for each        | n/a   |
| 7  |                  | variable of interest                                                   |       |
| 8  |                  |                                                                        |       |
| 9  | Outcome data     | #15 Report numbers in each exposure category, or summary               | 7-11  |
| 10 |                  | measures of exposure. Give information separately for cases            |       |
| 11 |                  | and controls                                                           |       |
| 12 |                  |                                                                        |       |
| 13 |                  |                                                                        |       |
| 14 | Main results     | #16a Give unadjusted estimates and, if applicable, confounder-         | 7-11  |
| 15 |                  | adjusted estimates and their precision (eg, 95% confidence             |       |
| 16 |                  | interval). Make clear which confounders were adjusted for and          |       |
| 17 |                  | why they were included                                                 |       |
| 18 |                  |                                                                        |       |
| 19 |                  |                                                                        |       |
| 20 |                  |                                                                        |       |
| 21 |                  | #16b Report category boundaries when continuous variables were         | 7-11  |
| 22 |                  | categorized                                                            |       |
| 23 |                  |                                                                        |       |
| 24 |                  |                                                                        |       |
| 25 |                  | #16c If relevant, consider translating estimates of relative risk into | 7-11  |
| 26 |                  | absolute risk for a meaningful time period                             |       |
| 27 |                  |                                                                        |       |
| 28 |                  |                                                                        |       |
| 29 | Other analyses   | #17 Report other analyses done—e.g., analyses of subgroups and         | n/a   |
| 30 |                  | interactions, and sensitivity analyses                                 |       |
| 31 |                  |                                                                        |       |
| 32 |                  |                                                                        |       |
| 33 | Key results      | #18 Summarise key results with reference to study objectives           | 11    |
| 34 |                  |                                                                        |       |
| 35 | Limitations      | #19 Discuss limitations of the study, taking into account sources of   | 12    |
| 36 |                  | potential bias or imprecision. Discuss both direction and              |       |
| 37 |                  | magnitude of any potential bias.                                       |       |
| 38 |                  |                                                                        |       |
| 39 |                  |                                                                        |       |
| 40 | Interpretation   | #20 Give a cautious overall interpretation considering objectives,     | 11-12 |
| 41 |                  | limitations, multiplicity of analyses, results from similar studies,   |       |
| 42 |                  | and other relevant evidence.                                           |       |
| 43 |                  |                                                                        |       |
| 44 |                  |                                                                        |       |
| 45 | Generalisability | #21 Discuss the generalisability (external validity) of the study      | 12    |
| 46 |                  | results                                                                |       |
| 47 |                  |                                                                        |       |
| 48 |                  |                                                                        |       |
| 49 | Funding          | #22 Give the source of funding and the role of the funders for the     | 13    |
| 50 |                  | present study and, if applicable, for the original study on which      |       |
| 51 |                  | the present article is based                                           |       |
| 52 |                  |                                                                        |       |
| 53 |                  |                                                                        |       |
| 54 |                  |                                                                        |       |

The STROBE checklist is distributed under the terms of the Creative Commons Attribution License CC-BY. This checklist was completed on 16. February 2018 using <http://www.goodreports.org/>, a tool made by the [EQUATOR Network](#) in collaboration with [Penelope.ai](#)
